# Supplementary material
Source: PubMed Central journal article supplement (PMC3305909)
Supplement: NIHMS358406-supplement-Supplemental_Information.pdf [file NIHMS358406-supplement-Supplemental_Information.pdf]

## Supplementary Materials for

### **In Vivo Liver Regeneration Potential of Human Induced Pluripotent Stem Cells from Diverse Origins**

Hua Liu, Yonghak Kim, Saul Sharkis, Luigi Marchionni, Yoon-Young Jang\*

\*To whom correspondence should be addressed. E-mail: yjang3@jhmi.edu

Published 11 May 2011, *Sci. Transl. Med.* **3**, 82ra39 (2011)

DOI: 10.1126/scitranslmed.3002376

#### **The PDF file includes:**

##### Methods

Fig. S1. Human keratinocyte-derived iPSC (iKera) colony formation and characterization.

Fig. S2. iKera cells can differentiate into all three primary germ layers in vitro and in vivo.

Fig. S3. Multidimensional scaling plot based on genome-scale DNA methylation analysis of human iPSCs and their parental cells, and hESCs.

Fig. S4. Multiple CYP450 enzyme activity analyses for human iPSC-derived hepatocytes.

Fig. S5. DMN mouse liver histology and function before and after the transplantation of human iPSC-derived hepatic cells.

Fig. S6. Detection of human DNA within transplanted mouse livers.

Fig. S7. Mouse gene analysis in engrafted human albumin-positive cells.

Fig. S8. Effect of passaging on pluripotency gene *OCT4* expression.

Table S1. Human iPSCs and ESCs used for this study and their pluripotency.

Table S2. Genes differentially methylated between endoderm cells (iPSCend and their parental cells) versus all other cell lines (all other iPSCs, other parental cells, and ESCs).

Table S3. Genes differentially methylated between mesoderm cells (all iPSCmes and their parental cells) versus all other cell lines (all other iPSCs, other parental cells, and ESCs).

Table S4. Genes differentially methylated between ectoderm cells (iPSCect and their parental cells) versus all other cell lines (all other iPSCs, other parental cells, and ESCs).

## **SUPPLEMENTAL MATERIALS**

### **Supplemental methods**

#### ***Retroviral production and reprogramming of keratinocytes.***

Retroviruses for the four factors were independently produced after co-transfecting the 293T cell line with pMX retroviral vectors expressing Oct4, Sox2, Klf4 or c-Myc (Addgene) and helper plasmids as previously described (10, 23). A 1:1:1:1 mix of retroviruses containing Oct4, Sox2, Klf4 and c-Myc was added to keratinocytes (passages 1) in the presence of 8 ug/ml polybrene. After incubating for 3 days in the serum free gold media (Lonza), media was replaced with 0.5mM NaB containing hESC medium. After transformed colonies were observed in the reprogramming plates, a pluripotent stem cell marker, TRA-1-60 antibody (1:200 dilution, Millipore) and Alexa555 conjugated anti-mouse IgM antibody (1:500 dilution, Invitrogen) were added into live cell culture (without fixation) and incubated for 1 hour at 37°C, to distinguish the iPSC from non-iPSC colonies. TRA-1-60 positive colonies appeared in about 6 days after retroviral transduction, and individual TRA-1-60 positive colonies were picked onto MEF coated plates.

#### ***Embryoid body formation and spontaneous differentiation into three germ layer cells.***

Human iPSCs (iK1, iK2, and iK3) were dissociated by collagenase IV digestion and plated in ultra low attachment plates (Corning) at the density of  $\sim 1 \times 10^6$  cells/well in the presence of

differentiation medium (DMEM supplemented with 20% FBS, L-glutamine,  $\beta$ -mercaptoethanol, and Non-essential amino acids). 50% of the medium was replaced with fresh medium every 2 days. After 7 days the embryoid bodies were transferred to 0.1% gelatin-coated culture dishes and cultured for additional 3 days before fixation and staining. Antibodies against Tuj1 (Covance, 1:500),  $\alpha$ -fetoprotein (Dako, 1:200), or SMA (DAKO, 1:100) were used to detect the spontaneously differentiated cells from EBs.

### ***Teratoma formation.***

Ten-week-old male NSG mice (Jackson Laboratories) were anesthetized and  $\sim$ 1 million iPSCs, resuspended in 20-40  $\mu$ l of 50% matrigel, were injected subcutaneously. Mice were euthanized 8 to 12 weeks after cell injection and tumors were analyzed following H&E protocol. All animal experiments were conducted following experimental protocols previously approved by Johns Hopkins IACUC.

### ***Immunofluorescence***

Cells were fixed with 4% paraformaldehyde. The following antibodies were used: TRA-1-60 (Millipore, 1:100); SSEA-4 (Cell Signaling, 1:200); Tuj1 (Covance, 1:500),  $\alpha$ -fetoprotein (Dako, 1:200), SMA (DAKO, 1:100), OCT-4 (Millipore, 1:100), NANOG (BD, 1:200). Secondary antibodies used were all of the Alexa Fluor Series from Invitrogen.

### ***RNA isolation and Quantitative Real-Time Polymerase Chain Reaction***

Total RNA was isolated from undifferentiated ESC/iPSCs cultured on matrigel and genomic DNA was removed using RNAqueous® -PCR kit (Applied Biosystems). 2 ug total RNA from each sample was subjected to cDNA using High Capacity RNA-to-cDNA kit (Applied Biosystems). cDNA products were diluted 1:100 for *Oct4* and 1:1000 for 18s rRNA in water, and 4 ul of each cDNA with TaqMan® Universal PCR Master Mix and TaqMan® Gene Expression Assays for each gene (Applied Biosystems) were used for real time PCR. Reactions were carried out in triplicate and analyzed on StepOnePlus Real-Time PCR System (Applied Biosystems).

### ***Detection of Human DNA within Transplanted Mouse Livers***

Human genomic DNA in the chimeric liver was detected by amplifying the human specific *Alu* gene (12). Genomic DNA samples were isolated from the liver using the DNeasy tissue kit, and used as templates to amplify the *Alu* repeats with human *Alu* specific primers (aatatggcccaactgcagaa; catcgcattttcacatccaa, product = 182bp) and the PCR Master Mix (Promega, Madison, WI). The liver tissues of control (nontransplanted) mice and human primary hepatocytes served as negative and positive controls.

### **Laser capture microdissection analysis**

Approximately 500 human ALB positive cells from transplanted mouse liver sections were collected by laser pulse capture (Zeiss P.A.L.M MicroLaser systems). Genomic DNA was purified from the collected human ALB positive cells and amplified by PCR using oligonucleotides from

mouse hypoxanthine-guanine phosphoribosyltransferase (HPRT) (agcgcaagttgaatctgc, agcgacaatctaccagag, product = 219bp) sequences.

**Supplemental Figure 1. Human keratinocyte-derived iPSC (iKera) colony formation and characterization.** (a) A diagram of keratinocyte derived iPSC generation protocol. (b) A phase contrast image of primary human keratinocytes before and after iPSC reprogramming. (c) Representative immunofluorescence analysis of one iPSC line derived from keratinocytes (iKera1) growing on Matrigel. Clear expression of the ESC surface antigens SSEA4 and TRA-1-60, and the nuclear transcription factors OCT4 and NANOG are observed.

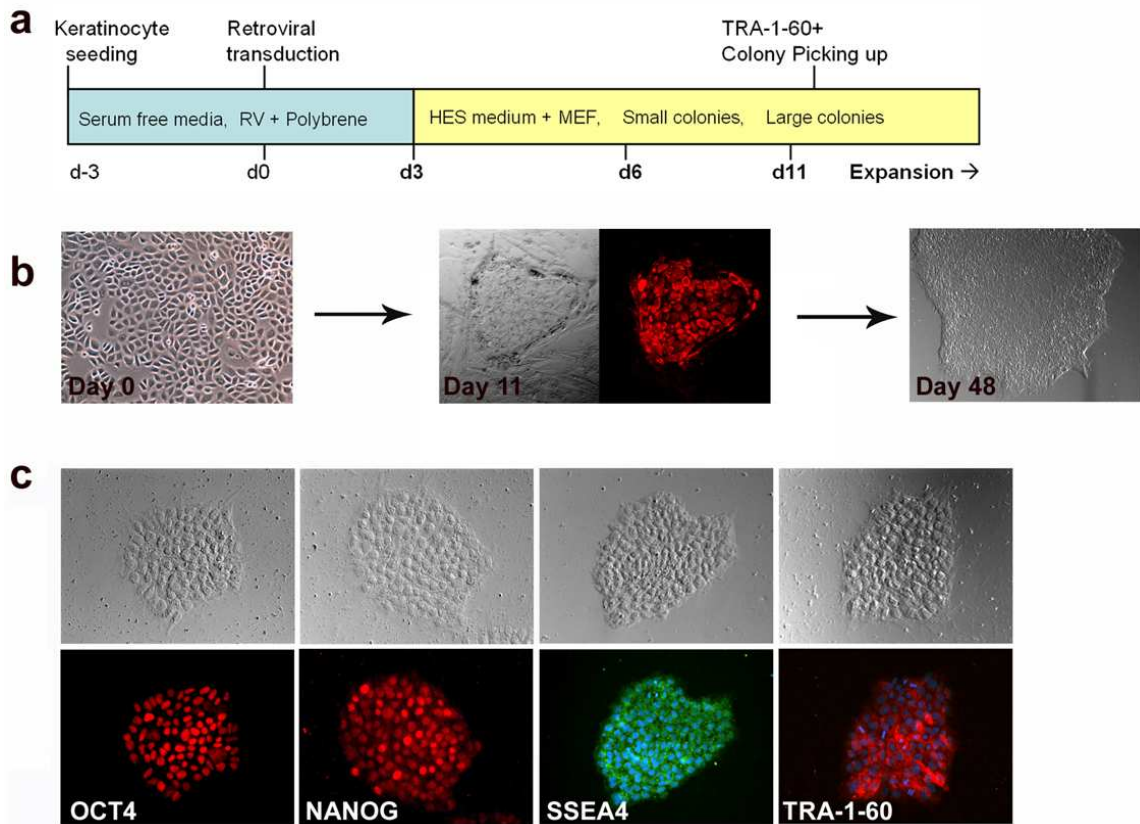

**Supplemental Figure 2: iKera cells can differentiate into all three primary germ layers in vitro and in vivo.** (a) Karyotyping of iKera cells. After 30 passages, these iPSCs (including iK1, iK2, and iK3 lines shown here) showed normal karyotypes. (b) Embryoid bodies derived from the iK1 line and in vitro differentiation into all three primary germ cell layers. After generation of embryoid bodies (left above) iK1 cells spontaneously differentiated into endoderm (AFP+, red, right above), mesoderm (SMA+, red, left below) and ectoderm (TuJ1+, green, right below). Blue nuclear staining is DAPI. (c) Spontaneous differentiation into all three germ layers including glandular epithelium, cartilages, pigmented epithelium is evident in teratomas.

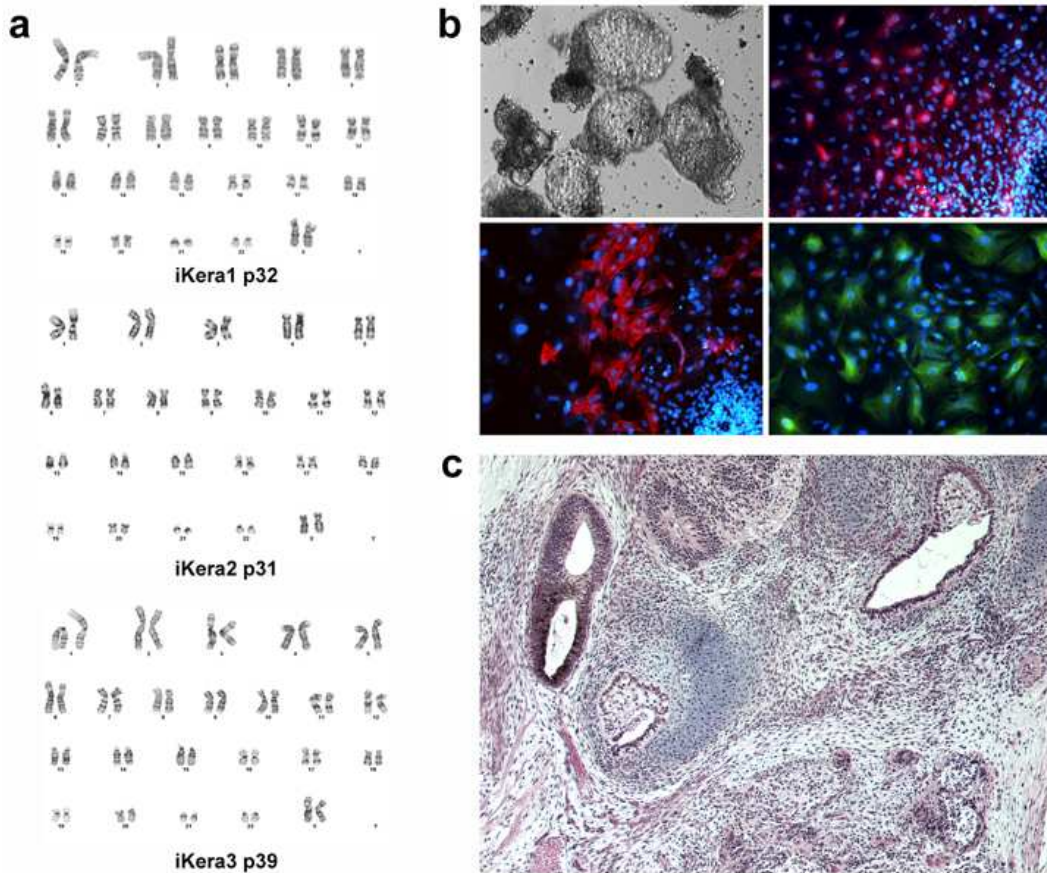

**Supplemental Figure 3. Multidimensional scaling plot based on genome-scale DNA methylation analysis of human iPSCs and their parental cells, and hESCs.** Euclidian distance and 25% most varying autosomal loci across all samples analyzed were used. Color code for each group of cell lines analyzed is shown in the figure. iM2, iM3 and iM7 are derived from bone marrow mesenchymal stem cells (MSC). iH11, iH14 and iH10 are from primary hepatocytes (Hep). iK1, iK2, and iK3 are from keratinocytes (Kera). iLC1 and iLC2 are from fibroblasts (PLCF). Both H1 and H9 are hESC lines.

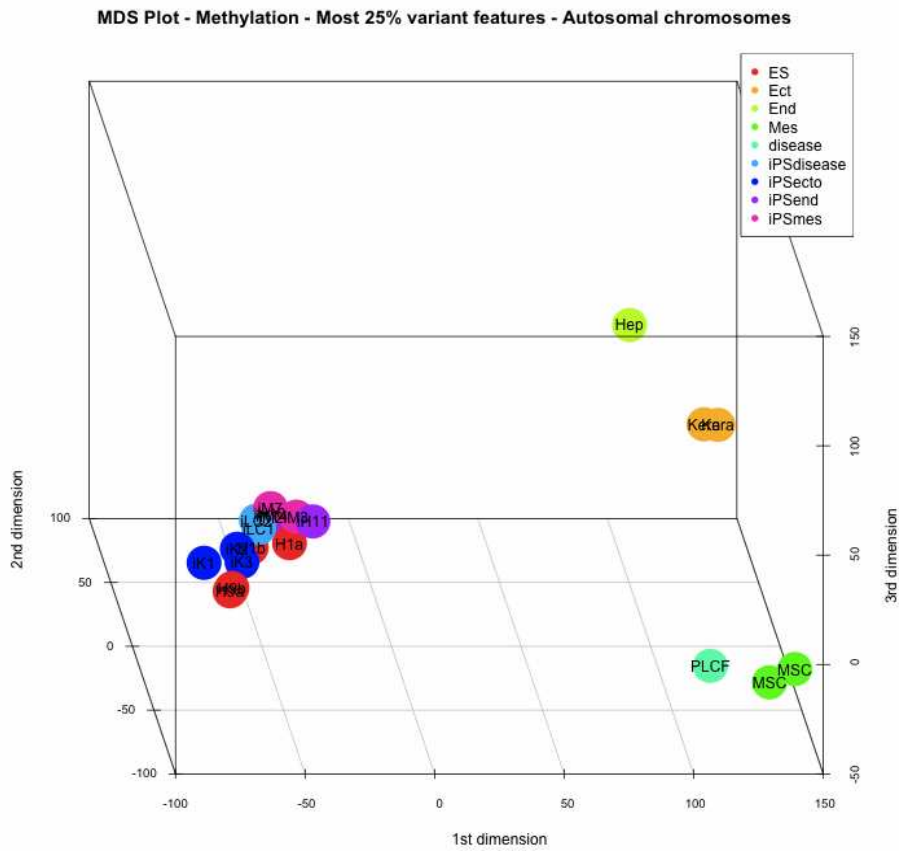

**Supplemental Figure 4. Multiple CYP450 enzyme activity analyses for human iPSC-derived hepatocytes.** CYP1A2, CYP2C9, CYP2C19, and CYP2D6 were further tested in iPSC derived hepatocytes (iPSC-hep). Levels of all of these key CYP enzyme activities of iPSC derived hepatocytes were comparable to human primary hepatocytes (PH), (n=3, Mean± SEM).

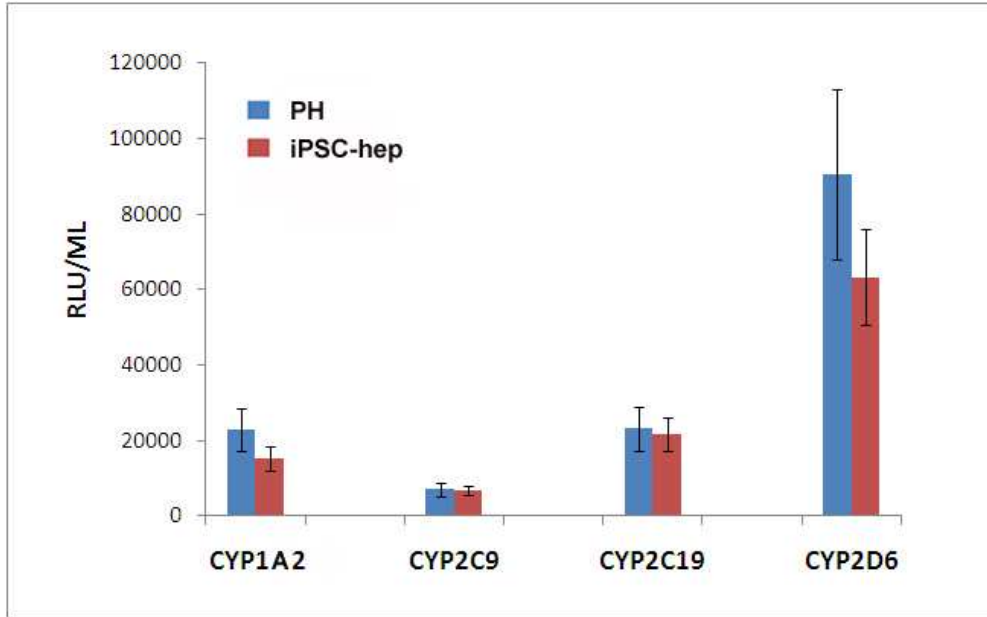



**Supplemental Figure 5. DMN mouse liver histology and function before and after the transplantation of human iPSC-derived hepatic cells**

(a) Representative pictures from each group (normal NSG mouse liver before transplantation, DMN 4 week treated NSG mouse liver, and a DMN treated NSG mouse liver transplanted with human iPSC derived hepatic cells) are shown. (b) Histological analyses of each liver shown in (a) (hematoxylin and eosin staining, magnification x400). (c, d) Levels of mouse serum albumin (ALB) and fibrinogen (FN) in the DMN treated mice with and without transplantation of human stem cell derived hepatic cells. Mouse serum albumin and plasma fibrinogen levels were measured using the ELISA kits (Bethyl lab E99-134, GenWay 40-374-130050). The bars indicate the means  $\pm$  SD (n=3).

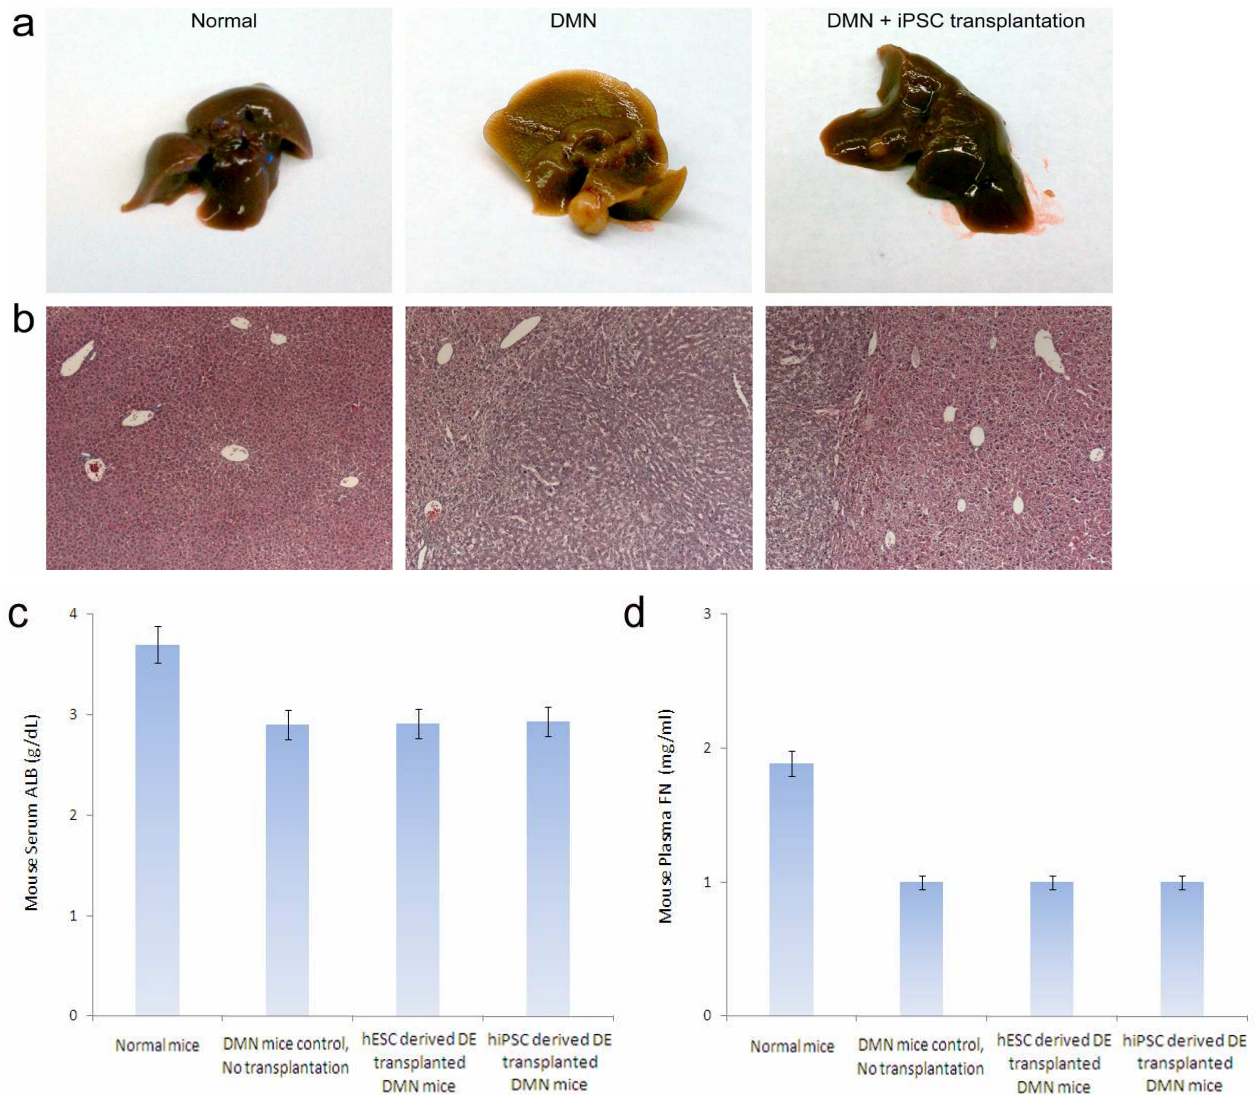

**Supplemental Figure 6. Detection of human DNA within transplanted mouse livers.**

PCR analyses using primers that specifically recognize human *Alu* sequences on genomic DNA isolated from mouse livers injected with human iPSC derived definitive endoderm cells. Human *Alu* DNA bands were detected in at least one or two tissue pieces (among multiple different portions measured) of recipient mouse livers which had shown 10 to 15% of human engraftment by human ALB staining. A typical result is shown here with iK1 transplanted mouse (1-7, seven different portions of the recipient liver tissue). The liver tissues of control (non-transplanted) mice served as a negative control and human cells (primary hepatocytes, PH) were used as a positive control.

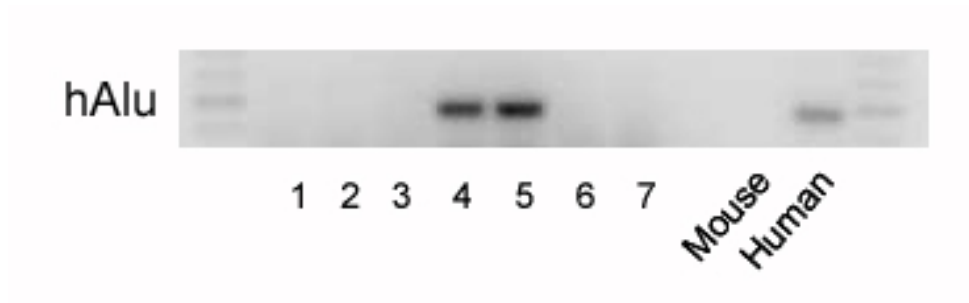

**Supplemental Figure 7. Mouse gene analysis in engrafted human albumin-positive cells**

PCR analyses for detecting mouse genes (HPRT) from the engrafted human ALB+ cells in mouse liver tissue. Human ALB+ cells were precisely collected from transplanted mouse liver tissues by laser capture microdissection and genomic DNA was purified for PCR. There was no mouse gene detected in the human ALB+ cells isolated from either human ESC-DE transplanted mice (hES) or human iPSC-DE transplanted mice (iH12, iM9, iK1). The mouse liver tissue control (mliver) contained the only cells expressing the mouse gene. This result indicates that the engrafted human hepatic cells did not undergo fusion with mouse liver cells.

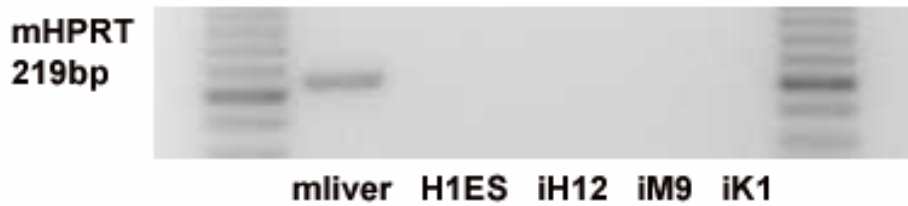

**Supplemental Figure 8. Effect of passaging on pluripotency gene *OCT4* expression.**

Quantification of the expression level of *OCT4* in multiple origin human iPSC lines harvested at early (p7-12) and later passages (p34-40) by quantitative PCR. H1 and H9 ESCs were used as controls as shown in the figure. No significant differences were observed between early and later passage iPSCs of different origin and the values were similar to hESCs. The values were normalized by 18S expression and expressed as relative quantitation (RQ), the error bars depict the SD (n=3).

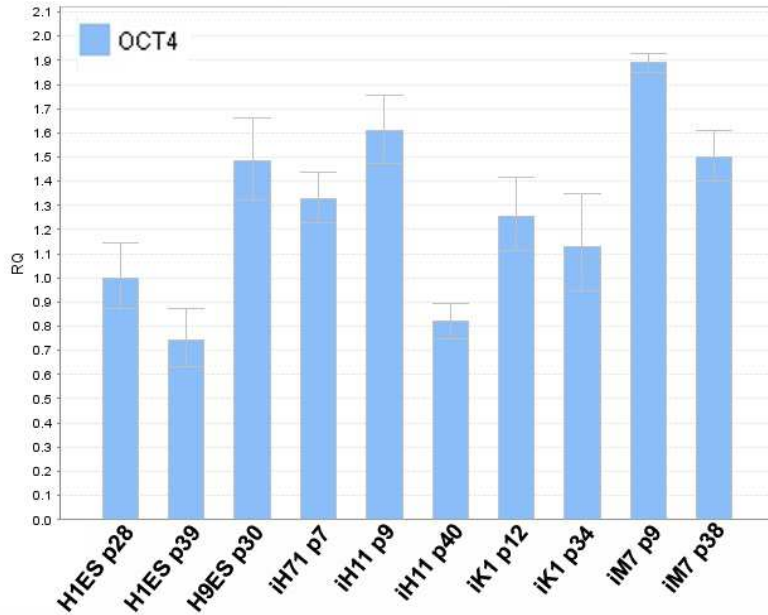

**Table S1. Human iPSCs and ESCs used for this study and their pluripotency**

| <b>Cell lines</b>       | <b>Cell sources</b> | <b>Germ layer of original cells</b> | <b>Pluripotency marker expression</b> | <b>EB formation /3 germ layer differentiation in vitro</b> | <b>Teratoma formation /In vivo pluripotency</b> |
|-------------------------|---------------------|-------------------------------------|---------------------------------------|------------------------------------------------------------|-------------------------------------------------|
| iH6, 10, 11, 12, 14, 71 | Hepatocytes         | Endoderm                            | Y                                     | Y                                                          | Y                                               |
| iM2, 3, 7, 9            | BM MSCs             | Mesoderm                            | Y                                     | Y                                                          | Y                                               |
| iLC1, 2                 | Liver fibroblasts   | Mesoderm                            | Y                                     | Y                                                          | Y                                               |
| iK1, 2, 3               | Keratinocytes       | Ectoderm                            | Y                                     | Y                                                          | Y                                               |
| H1 ES                   | Inner Cell Mass     | Blastocyst                          | Y                                     | Y                                                          | Y                                               |
| H9 ES                   | Inner Cell Mass     | Blastocyst                          | Y                                     | Y                                                          | Y                                               |

**Table S2.** Genes differentially methylated between endoderm cells (iPSCend and their parental cells) versus all other cell lines (all other iPSCs, other parental cells, and ESCs), q-value < 0.001

**Table S3.** Genes differentially methylated between mesoderm cells (all iPSCmes and their parental cells) versus all other cell lines (all other iPSCs, other parental cells, and ESCs), q-value < 0.001

**Table S4.** Genes differentially methylated between ectoderm cells (iPSCect and their parental cells) versus all other cell lines (all other iPSCs, other parental cells, and ESCs), q-value < 0.001

Table S2-S4; These analyses were carried on using the log<sub>2</sub> ratio between un-methylated and methylated probes, as well as the beta statistics with overlapping results.

**SYMBOL:** Gene symbol of the neighboring gene; **t:** moderated t-statistics;

**Tables S2-S4 are separately uploaded as supporting online material-2.**

Table S2. END vs REST

| NCBI Entrez Gene identifiers | SYMBOL    | t    |
|------------------------------|-----------|------|
| 9121                         | SLC16A5   | 22.2 |
| 57124                        | CD248     | 21.3 |
| 84225                        | ZMYND15   | 20.9 |
| 23098                        | SARM1     | 20.7 |
| 57678                        | GPAM      | 20   |
| 400931                       | FLJ27365  | 18.3 |
| 9555                         | H2AFY     | 17.8 |
| 22906                        | TRAK1     | 16.5 |
| 55267                        | FLJ10945  | 16.5 |
| 114904                       | C1QTNF6   | 16.3 |
| 54905                        | CYP2W1    | 16   |
| 4056                         | LTC4S     | 15.9 |
| 23543                        | RBM9      | 15.6 |
| 4237                         | MFAP2     | 15.6 |
| 83871                        | RAB34     | 15.1 |
| 79652                        | C16orf30  | 14.9 |
| 81621                        | KAZALD1   | 14.8 |
| 27019                        | DNAI1     | 14.8 |
| 5799                         | PTPRN2    | 14.7 |
| 221091                       | LOC221091 | 14.3 |
| 90226                        | UCN2      | 14.2 |
| 1307                         | COL16A1   | 14.1 |
| 401459                       | FLJ46365  | 14   |
| 632                          | BGLAP     | 12.9 |
| 284358                       | FLJ36070  | 12.8 |
| 9196                         | KCNAB3    | 12.7 |
| 7465                         | WEE1      | 12.7 |
| 10962                        | MLLT11    | 12.5 |
| 64129                        | TINAGL1   | 12.5 |
| 1003                         | CDH5      | 12.5 |
| 23371                        | TENC1     | 12.3 |
| 116983                       | CENTB5    | 12.1 |
| 54471                        | FLJ20232  | 12.1 |
| 27350                        | APOBEC3C  | 12   |
| 9289                         | GPR56     | 11.7 |
| 10578                        | GPLY      | 11.7 |
| 57111                        | RAB25     | 11.6 |
| 115761                       | ARL11     | 11.6 |

Table S3 MES vs REST

| NCBI Entrez Gene identifiers | SYMBOL    | t    |
|------------------------------|-----------|------|
| 2875                         | GPT       | 27.2 |
| 2886                         | GRB7      | 22.5 |
| 2099                         | ESR1      | 17.7 |
| 60529                        | ALX4      | 17.3 |
| 57402                        | S100A14   | 16.6 |
| 2202                         | EFEMP1    | 16.3 |
| 5524                         | PPP2R4    | 16.1 |
| 57167                        | SALL4     | 15.7 |
| 200634                       | KRTCAP3   | 15.6 |
| 3918                         | LAMC2     | 15.5 |
| 284723                       | SLC25A34  | 15.4 |
| 29775                        | CARD10    | 15.4 |
| 3233                         | HOXD4     | 15.3 |
| 64220                        | STRA6     | 15.2 |
| 5308                         | PITX2     | 14.7 |
| 80004                        | RBM35B    | 14.7 |
| 116983                       | CENTB5    | 14.2 |
| 3199                         | HOXA2     | 14.1 |
| 23367                        | LARP1     | 14   |
| 4803                         | NGFB      | 13.7 |
| 2812                         | GP1BB     | 13.6 |
| 3083                         | HGFAC     | 13.5 |
| 9208                         | LRRFIP1   | 13.5 |
| 150135                       | C21orf129 | 13.2 |
| 6242                         | RTKN      | 13   |
| 164284                       | FLJ90166  | 12.8 |
| 1018                         | CDK3      | 12.4 |
| 23616                        | SH3BP1    | 12.3 |
| 1907                         | EDN2      | 12.1 |
| 6935                         | TCF8      | 11.9 |
| 51171                        | DHRS10    | 11.8 |
| 84951                        | TNS4      | 11.8 |
| 388428                       | FLJ44861  | 11.7 |
| 104                          | ADARB1    | 11.5 |
| 6910                         | TBX5      | 11.5 |
| 90050                        | C14orf152 | 11.4 |
| 3159                         | HMGA1     | 11.4 |
| 11259                        | DOC1      | 11.3 |

Table S4 ECT vs REST

| NCBI Entrez Gene identifiers | SYMBOL   | t    |
|------------------------------|----------|------|
| 3633                         | INPP5B   | 22.5 |
| 25900                        | 103      | 20.9 |
| 9891                         | NUAK1    | 19.1 |
| 64405                        | CDH22    | 17.8 |
| 374872                       | C19orf35 | 17.7 |
| 84617                        | TUBB6    | 17.2 |
| 5083                         | PAX9     | 17   |
| 57125                        | PLXDC1   | 16.9 |
| 80341                        | BPIL1    | 16.6 |
| 8309                         | ACOX2    | 16.5 |
| 399717                       | FLJ45983 | 16.3 |
| 30845                        | EHD3     | 16.2 |
| 53947                        | A4GALT   | 16.2 |
| 221421                       | C6orf206 | 15.8 |
| 84618                        | NT5C1A   | 15.5 |
| 83594                        | NUDT12   | 15.4 |
| 54790                        | FLJ20032 | 15.3 |
| 114757                       | CYGB     | 14.9 |
| 353131                       | LCE1A    | 14.6 |
| 91373                        | UAP1L1   | 14.5 |
| 83595                        | SOX7     | 14.3 |
| 257236                       | FLJ90575 | 14.2 |
| 9450                         | LY86     | 14.2 |
| 10747                        | MASP2    | 13.9 |
| 114902                       | C1QTNF5  | 13.7 |
| 51042                        | ZNF593   | 13.7 |
| 84647                        | PLA2G12B | 13.7 |
| 7380                         | UPK3A    | 13.7 |
| 171019                       | ADAMTS19 | 13.3 |
| 11189                        | TNRC4    | 13.2 |
| 3131                         | HLF      | 13.2 |
| 3699                         | ITIH3    | 13.2 |
| 115701                       | HAK      | 13.1 |
| 9021                         | SOCS3    | 13.1 |
| 10485                        | C1orf61  | 13.1 |
| 50507                        | NOX4     | 13.1 |
| 148738                       | HFE2     | 13.1 |
| 1903                         | EDG3     | 13   |

|        |           |      |
|--------|-----------|------|
| 90678  | LRSAM1    | 11.5 |
| 3171   | FOXA3     | 11.4 |
| 284837 | LOC284837 | 11.3 |
| 10801  | 9-Sep     | 11.3 |
| 128876 | C20orf128 | 11.2 |
| 1128   | CHRM1     | 11.2 |
| 23413  | FREQ      | 11.1 |
| 53822  | FXYP7     | 11.1 |
| 9051   | PSTPIP1   | 11   |
| 91663  | MYADM     | 11   |
| 54106  | TLR9      | 11   |
| 343035 | C1orf36   | 11   |
| 27134  | TJP3      | 11   |
| 6614   | SN        | 10.9 |
| 65094  | JMJD4     | 10.9 |
| 339665 | SLC35E4   | 10.9 |
| 4793   | NFKBIB    | 10.8 |
| 83742  | MARVELD1  | 10.8 |
| 6776   | STAT5A    | 10.7 |
| 1638   | DCT       | 10.7 |
| 3866   | KRT15     | 10.6 |
| 90199  | WFDC8     | 10.6 |
| 6385   | SDC4      | 10.5 |
| 56302  | TRPV5     | 10.4 |
| 81875  | ISG20L2   | 10.4 |
| 23061  | KIAA0676  | 10.4 |
| 7462   | LAT2      | 10.3 |
| 338773 | TMEM119   | 10.3 |
| 6398   | SECTM1    | 10.3 |
| 80781  | COL18A1   | 10.2 |
| 84948  | TIGD5     | 10.2 |
| 390212 | GPR152    | 10.1 |
| 26     | ABP1      | 10.1 |
| 2626   | GATA4     | 10.1 |
| 162514 | TRPV3     | 10   |
| 22924  | MAPRE3    | 9.98 |
| 284114 | TMEM102   | 9.97 |
| 9002   | F2RL3     | 9.95 |
| 1454   | CSNK1E    | 9.81 |
| 4261   | CIITA     | 9.81 |
| 1760   | DMPK      | 9.81 |
| 2246   | FGF1      | 9.77 |
| 11322  | TMC6      | 9.74 |
| 146802 | FLJ31196  | 9.74 |

|        |          |      |
|--------|----------|------|
| 55103  | RALGPS2  | 11.2 |
| 83597  | RTP3     | 11.2 |
| 4773   | NFATC2   | 11.2 |
| 26007  | DAK      | 11   |
| 3914   | LAMB3    | 11   |
| 4487   | MSX1     | 10.9 |
| 3856   | KRT8     | 10.9 |
| 2706   | GJB2     | 10.9 |
| 5777   | PTPN6    | 10.8 |
| 1      | A1BG     | 10.8 |
| 221833 | SP8      | 10.8 |
| 203100 | HTRA4    | 10.8 |
| 128602 | C20orf85 | 10.7 |
| 1776   | DNASE1L3 | 10.7 |
| 122416 | ANKRD9   | 10.6 |
| 2041   | EPHA1    | 10.6 |
| 55615  | PRR5     | 10.5 |
| 3898   | LAD1     | 10.5 |
| 9750   | C6orf32  | 10.5 |
| 151011 | 10-Sep   | 10.4 |
| 9249   | DHRS3    | 10.4 |
| 4320   | MMP11    | 10.3 |
| 780    | DDR1     | 10.3 |
| 5265   | SERPINA1 | 10.3 |
| 9289   | GPR56    | 10.1 |
| 5083   | PAX9     | 10   |
| 8424   | BBOX1    | 10   |
| 8710   | SERPINB7 | 10   |
| 55620  | STAP2    | 10   |
| 85004  | RERG     | 9.91 |
| 345    | APOC3    | 9.88 |
| 338442 | GPR109A  | 9.71 |
| 1030   | CDKN2B   | 9.59 |
| 10672  | GNA13    | 9.46 |
| 9028   | RHBDL1   | 9.4  |
| 54970  | TTC12    | 9.37 |
| 7253   | TSHR     | 9.32 |
| 5306   | PITPNA   | 9.26 |
| 81029  | WNT5B    | 9.25 |
| 1044   | CDX1     | 9.22 |
| 8673   | VAMP8    | 9.21 |
| 843    | CASP10   | 9.18 |
| 9048   | ARTN     | 9.17 |
| 2155   | F7       | 9.14 |

|        |           |      |
|--------|-----------|------|
| 221    | ALDH3B1   | 13   |
| 63924  | CIDEC     | 12.7 |
| 5867   | RAB4A     | 12.6 |
| 1280   | COL2A1    | 12.6 |
| 113220 | KIF12     | 12.6 |
| 90050  | C14orf152 | 12.5 |
| 6770   | STAR      | 12.4 |
| 4313   | MMP2      | 12.4 |
| 283600 | C14orf68  | 12.2 |
| 3386   | ICAM4     | 12.1 |
| 11117  | EMILIN1   | 12   |
| 22981  | KIAA0980  | 12   |
| 10864  | SLC22A7   | 12   |
| 3855   | KRT7      | 11.9 |
| 55237  | C14orf115 | 11.9 |
| 6236   | RRAD      | 11.9 |
| 1      | A1BG      | 11.6 |
| 2030   | SLC29A1   | 11.6 |
| 5575   | PRKAR1B   | 11.6 |
| 6927   | TCF1      | 11.6 |
| 25999  | CLIPR-59  | 11.5 |
| 60436  | TGIF2     | 11.5 |
| 3083   | HGFAC     | 11.4 |
| 219928 | MRGPRF    | 11.4 |
| 4762   | NEUROG1   | 11.3 |
| 718    | C3        | 11.1 |
| 3697   | ITIH1     | 11   |
| 23231  | KIAA0746  | 10.9 |
| 335    | APOA1     | 10.9 |
| 4625   | MYH7      | 10.8 |
| 9253   | NUMBL     | 10.7 |
| 81493  | SYNC1     | 10.7 |
| 866    | SERPINA6  | 10.7 |
| 80723  | TMEM22    | 10.7 |
| 222487 | GPR97     | 10.6 |
| 2662   | GDF10     | 10.6 |
| 3929   | LBP       | 10.5 |
| 761    | CA3       | 10.5 |
| 29993  | PACSIN1   | 10.5 |
| 23037  | PDZK3     | 10.5 |
| 29881  | NPC1L1    | 10.4 |
| 51156  | SERPINA10 | 10.4 |
| 7490   | WT1       | 10.4 |
| 1749   | DLX5      | 10.4 |



|        |           |      |
|--------|-----------|------|
| 10614  | HEXIM1    | 9.71 |
| 8435   | SOAT2     | 9.7  |
| 79748  | LMAN1L    | 9.69 |
| 340205 | TREML1    | 9.66 |
| 55205  | ZNF532    | 9.64 |
| 55287  | TMEM40    | 9.64 |
| 84985  | FAM83A    | 9.63 |
| 2694   | GIF       | 9.58 |
| 9362   | CPNE6     | 9.49 |
| 79690  | GAL3ST4   | 9.37 |
| 340061 | LOC340061 | 9.33 |
| 148423 | C1orf52   | 9.31 |
| 359710 | C20orf185 | 9.3  |
| 2950   | GSTP1     | 9.26 |
| 6275   | S100A4    | 9.24 |
| 83401  | ELOVL3    | 9.23 |
| 2709   | GJB5      | 9.22 |
| 2214   | FCGR3A    | 9.22 |
| 2125   | EVPL      | 9.2  |
| 116840 | CNTROB    | 9.2  |
| 6273   | S100A2    | 9.09 |
| 5159   | PDGFRB    | 9.08 |
| 3036   | HAS1      | 9.04 |
| 80097  | FLJ14346  | 9    |
| 54578  | UGT1A6    | 9    |
| 6696   | SPP1      | 8.99 |
| 6358   | CCL14     | 8.97 |
| 5753   | PTK6      | 8.95 |
| 81607  | PVRL4     | 8.91 |
| 388533 | UNQ467    | 8.9  |
| 80736  | SLC44A4   | 8.86 |
| 6348   | CCL3      | 8.82 |
| 137797 | LYPD2     | 8.79 |
| 56833  | SLAMF8    | 8.77 |
| 10544  | PROCR     | 8.76 |
| 11117  | EMILIN1   | 8.65 |
| 136371 | ASB10     | 8.64 |
| 85456  | TNKS1BP1  | 8.63 |
| 23500  | DAAM2     | 8.63 |
| 126353 | C19orf21  | 8.62 |
| 3590   | IL11RA    | 8.59 |
| 79413  | ZBED2     | 8.57 |
| 147495 | APCDD1    | 8.56 |
| 23650  | TRIM29    | 8.55 |

|        |          |      |
|--------|----------|------|
| 64866  | CDCP1    | 9.11 |
| 146456 | TMED6    | 9.06 |
| 1305   | COL13A1  | 9.05 |
| 115572 | FAM46B   | 8.96 |
| 7022   | TFAP2C   | 8.95 |
| 10110  | SGK2     | 8.92 |
| 5443   | POMC     | 8.92 |
| 65012  | SLC26A10 | 8.91 |
| 8614   | STC2     | 8.87 |
| 131669 | UROC1    | 8.86 |
| 114038 | C21orf84 | 8.84 |
| 57533  | TBC1D14  | 8.82 |
| 421    | ARVCF    | 8.8  |
| 9020   | MAP3K14  | 8.8  |
| 4081   | MAB21L1  | 8.78 |
| 6615   | SNAI1    | 8.74 |
| 222894 | FERD3L   | 8.71 |
| 5493   | PPL      | 8.7  |
| 2300   | FOXL1    | 8.68 |
| 54436  | SH3TC1   | 8.68 |
| 90990  | KIFC2    | 8.6  |
| 8416   | ANXA9    | 8.6  |
| 83541  | C20orf55 | 8.58 |
| 54682  | MANSC1   | 8.57 |
| 151278 | FLJ32447 | 8.54 |
| 5077   | PAX3     | 8.53 |
| 27111  | SDCBP2   | 8.39 |
| 79574  | EPS8L3   | 8.38 |
| 2027   | ENO3     | 8.28 |
| 58473  | PLEKHB1  | 8.23 |
| 1775   | DNASE1L2 | 8.2  |
| 3909   | LAMA3    | 8.2  |
| 1244   | ABCC2    | 8.19 |
| 3294   | HSD17B2  | 8.19 |
| 400830 | DEFB32   | 8.12 |
| 9022   | CLIC3    | 8.12 |
| 2672   | GFI1     | 8.07 |
| 2147   | F2       | 8.02 |
| 2877   | GPX2     | 8.02 |
| 8431   | NROB2    | 7.98 |
| 26232  | FBXO2    | 7.97 |
| 3960   | LGALS4   | 7.97 |
| 7850   | IL1R2    | 7.96 |
| 50619  | DEF6     | 7.93 |

|        |          |      |
|--------|----------|------|
| 54810  | GIPC2    | 10.3 |
| 6484   | ST3GAL4  | 10.3 |
| 5648   | MASP1    | 10.3 |
| 4490   | MT1B     | 10.3 |
| 57168  | ASPHD2   | 10.3 |
| 54751  | FBLIM1   | 10.2 |
| 7416   | VDAC1    | 10.2 |
| 79574  | EPS8L3   | 10.1 |
| 64757  | MOSC1    | 10.1 |
| 6506   | SLC1A2   | 10   |
| 43847  | KLK14    | 10   |
| 7802   | DNALI1   | 9.96 |
| 108    | ADCY2    | 9.95 |
| 9970   | NR1I3    | 9.94 |
| 3857   | KRT9     | 9.92 |
| 23526  | HMHA1    | 9.91 |
| 8525   | DGKZ     | 9.85 |
| 1812   | DRD1     | 9.84 |
| 25956  | SEC31L2  | 9.84 |
| 9099   | USP2     | 9.78 |
| 11317  | RBPSUHL  | 9.74 |
| 27198  | GPR81    | 9.65 |
| 10335  | MRVI1    | 9.61 |
| 7015   | TERT     | 9.61 |
| 353134 | LCE1D    | 9.6  |
| 353144 | LCE3C    | 9.57 |
| 53841  | MUCDHL   | 9.56 |
| 3889   | KRTHB3   | 9.55 |
| 57538  | ALPK3    | 9.5  |
| 9543   | PUNC     | 9.48 |
| 5118   | PCOLCE   | 9.45 |
| 9811   | KIAA0427 | 9.41 |
| 81621  | KAZALD1  | 9.41 |
| 4239   | MFAP4    | 9.38 |
| 325    | APCS     | 9.36 |
| 2147   | F2       | 9.32 |
| 10873  | ME3      | 9.32 |
| 124404 | FLJ25410 | 9.32 |
| 2028   | ENPEP    | 9.26 |
| 8431   | NROB2    | 9.21 |
| 23542  | MAPK8IP2 | 9.19 |
| 2260   | FGFR1    | 9.18 |
| 8382   | NME5     | 9.17 |
| 8692   | HYAL2    | 9.16 |

|        |            |      |
|--------|------------|------|
| 9450   | LY86       | 8.52 |
| 348174 | LOC348174  | 8.5  |
| 374739 | TEPP       | 8.5  |
| 253935 | ANGPTL5    | 8.48 |
| 8436   | SDPR       | 8.48 |
| 3689   | ITGB2      | 8.47 |
| 80380  | PDCD1LG2   | 8.42 |
| 8572   | PDLIM4     | 8.38 |
| 26191  | PTPN22     | 8.32 |
| 148170 | CDC42EP5   | 8.29 |
| 201294 | UNC13D     | 8.22 |
| 2170   | FABP3      | 8.2  |
| 22874  | PLEKHA6    | 8.18 |
| 2012   | EMP1       | 8.18 |
| 8857   | FCGBP      | 8.17 |
| 22941  | SHANK2     | 8.15 |
| 4245   | MGAT1      | 8.13 |
| 84766  | MGC4266    | 8.12 |
| 23263  | MCF2L      | 8.08 |
| 4720   | NDUFS2     | 8.07 |
| 55898  | UNC45A     | 8.07 |
| 6820   | SULT2B1    | 8    |
| 2215   | FCGR3B     | 7.99 |
| 84033  | OBSCN      | 7.93 |
| 55643  | BTBD2      | 7.88 |
| 1606   | DGKA       | 7.87 |
| 1101   | CHAD       | 7.86 |
| 1535   | CYBA       | 7.85 |
| 23429  | RYBP       | 7.83 |
| 2810   | SFN        | 7.77 |
| 51161  | C3orf18    | 7.76 |
| 83638  | Bles03     | 7.76 |
| 2022   | ENG        | 7.75 |
| 246176 | GAS2L2     | 7.74 |
| 56944  | OLFML3     | 7.73 |
| 221472 | FGD2       | 7.7  |
| 4222   | MEOX1      | 7.7  |
| 93643  | TJAP1      | 7.69 |
| 1742   | DLG4       | 7.69 |
| 1728   | NQO1       | 7.59 |
| 51629  | CGI-69     | 7.59 |
| 11078  | HRIHFB2122 | 7.54 |
| 3846   | KRTAP5-9   | 7.54 |
| 90019  | SYT8       | 7.54 |

|        |           |      |
|--------|-----------|------|
| 2741   | GLRA1     | 7.81 |
| 3866   | KRT15     | 7.77 |
| 4232   | MEST      | 7.76 |
| 5345   | SERPINF2  | 7.75 |
| 10410  | IFITM3    | 7.73 |
| 3200   | HOXA3     | 7.71 |
| 108    | ADCY2     | 7.7  |
| 5697   | PYY       | 7.68 |
| 10848  | PPP1R13L  | 7.66 |
| 55287  | TMEM40    | 7.65 |
| 130367 | SGPP2     | 7.6  |
| 5753   | PTK6      | 7.59 |
| 3299   | HSF4      | 7.59 |
| 858    | CAV2      | 7.58 |
| 3699   | ITIH3     | 7.54 |
| 149708 | WFDC5     | 7.51 |
| 3232   | HOXD3     | 7.49 |
| 79152  | FA2H      | 7.49 |
| 5970   | RELA      | 7.47 |
| 335    | APOA1     | 7.43 |
| 272    | AMPD3     | 7.39 |
| 5763   | PTMS      | 7.37 |
| 144568 | A2ML1     | 7.37 |
| 64921  | NBLA04196 | 7.37 |
| 80818  | ZNF436    | 7.36 |
| 201780 | SLC10A4   | 7.35 |
| 5364   | PLXNB1    | 7.34 |
| 2769   | GNA15     | 7.34 |
| 6899   | TBX1      | 7.34 |
| 283078 | IRXL1     | 7.31 |
| 89796  | NAV1      | 7.28 |
| 9333   | TGM5      | 7.28 |
| 4485   | MST1      | 7.26 |
| 646    | BNC1      | 7.26 |
| 2308   | FOXO1A    | 7.25 |
| 389434 | C6orf71   | 7.22 |
| 1748   | DLX4      | 7.19 |
| 9235   | IL32      | 7.13 |
| 8692   | HYAL2     | 7.06 |
| 4199   | ME1       | 7.06 |
| 116844 | LRG1      | 7.06 |
| 712    | C1QA      | 7.01 |
| 169166 | MGC39715  | 7    |
| 635    | BHMT      | 7    |

|        |           |      |
|--------|-----------|------|
| 8993   | PGLYRP1   | 9.1  |
| 90332  | XTP7      | 9.08 |
| 60312  | AFAP      | 9.08 |
| 763    | CA5A      | 9.06 |
| 5348   | FXYD1     | 9.06 |
| 30008  | EFEMP2    | 9    |
| 116835 | HSPA12B   | 9    |
| 133121 | ENPP6     | 9    |
| 5624   | PROC      | 8.97 |
| 4489   | MT1A      | 8.97 |
| 85480  | TSLP      | 8.94 |
| 51160  | VPS28     | 8.93 |
| 1293   | COL6A3    | 8.91 |
| 3172   | HNF4A     | 8.86 |
| 7849   | PAX8      | 8.83 |
| 60385  | TSKS      | 8.78 |
| 716    | C1S       | 8.74 |
| 10110  | SGK2      | 8.74 |
| 147746 | HIPK4     | 8.72 |
| 119587 | CPXM2     | 8.71 |
| 338321 | NALP9     | 8.68 |
| 7804   | LRP8      | 8.59 |
| 131669 | UROC1     | 8.59 |
| 349136 | LOC349136 | 8.57 |
| 54544  | C1orf42   | 8.56 |
| 10449  | ACAA2     | 8.56 |
| 3483   | IGFALS    | 8.51 |
| 388218 | UNQ5810   | 8.51 |
| 84101  | USP44     | 8.5  |
| 51733  | UPB1      | 8.49 |
| 4776   | NFATC4    | 8.47 |
| 8614   | STC2      | 8.46 |
| 4922   | NTS       | 8.46 |
| 2822   | GPLD1     | 8.43 |
| 161247 | LOC161247 | 8.42 |
| 5368   | PNOC      | 8.41 |
| 344838 | PAQR9     | 8.32 |
| 5345   | SERPINF2  | 8.31 |
| 3707   | ITPKB     | 8.3  |
| 5173   | PDYN      | 8.3  |
| 9590   | AKAP12    | 8.29 |
| 255043 | TMEM86B   | 8.26 |
| 6707   | SPRR3     | 8.23 |
| 5376   | PMP22     | 8.22 |

|        |          |      |
|--------|----------|------|
| 1212   | CLTB     | 7.53 |
| 25959  | ANKRD25  | 7.52 |
| 118738 | ZNF488   | 7.52 |
| 113622 | ADPRHL1  | 7.52 |
| 8476   | CDC42BPA | 7.5  |
| 7113   | TMPRSS2  | 7.49 |
| 3914   | LAMB3    | 7.48 |
| 126308 | MOBKL2A  | 7.45 |
| 3888   | KRTHB2   | 7.45 |
| 64333  | ARHGAP9  | 7.45 |
| 55273  | TMEM100  | 7.43 |
| 220388 | FLJ38159 | 7.4  |
| 414062 | CCL3L3   | 7.37 |
| 9253   | NUMBL    | 7.36 |
| 374875 | SCDR10   | 7.34 |
| 286256 | LCN12    | 7.32 |
| 6538   | SLC6A11  | 7.31 |
| 3265   | HRAS     | 7.3  |
| 1639   | DCTN1    | 7.28 |
| 170575 | GIMAP1   | 7.28 |
| 1066   | CES1     | 7.26 |
| 79228  | WDR58    | 7.25 |
| 944    | TNFSF8   | 7.23 |
| 83933  | HDAC10   | 7.2  |
| 114131 | UCN3     | 7.17 |
| 3770   | KCNJ14   | 7.15 |
| 84734  | C1orf90  | 7.12 |
| 2134   | EXTL1    | 7.09 |
| 8915   | BCL10    | 7.08 |
| 5623   | PSPN     | 7.07 |
| 55567  | DNAH3    | 7.07 |
| 5438   | POLR2I   | 7.07 |
| 57010  | CABP4    | 7.05 |
| 790    | CAD      | 7.05 |
| 84283  | TMEM79   | 7.05 |
| 53828  | FXYD4    | 7.03 |
| 84292  | MORG1    | 7.02 |
| 6678   | SPARC    | 7.02 |
| 124975 | GGT6     | 7    |
| 23351  | KIAA0323 | 6.98 |
| 84286  | MGC4618  | 6.98 |
| 29951  | PDZRN4   | 6.97 |
| 283897 | C16orf54 | 6.96 |
| 257203 | DSCR9    | 6.96 |

|        |          |      |
|--------|----------|------|
| 53832  | IL20RA   | 6.98 |
| 3990   | LIPC     | 6.96 |
| 6717   | SRI      | 6.95 |
| 347733 | TUBB2B   | 6.95 |
| 23562  | CLDN14   | 6.95 |
| 4009   | LMX1A    | 6.93 |
| 26281  | FGF20    | 6.92 |
| 90019  | SYT8     | 6.91 |
| 4250   | SCGB2A2  | 6.86 |
| 822    | CAPG     | 6.85 |
| 79755  | FLJ13841 | 6.84 |
| 202915 | MGC9712  | 6.84 |
| 3651   | IPF1     | 6.8  |
| 2625   | GATA3    | 6.76 |
| 10747  | MASP2    | 6.75 |
| 64218  | SEMA4A   | 6.74 |
| 404217 | CTXN1    | 6.73 |
| 57104  | PNPLA2   | 6.71 |
| 977    | CD151    | 6.71 |
| 9154   | SLC28A1  | 6.69 |
| 51296  | SLC15A3  | 6.68 |
| 57580  | PREX1    | 6.66 |
| 54923  | LIME1    | 6.65 |
| 2114   | ETS2     | 6.64 |
| 7498   | XDH      | 6.62 |
| 10406  | WFDC2    | 6.59 |
| 84985  | FAM83A   | 6.58 |
| 10529  | NEBL     | 6.56 |
| 1271   | CNTFR    | 6.56 |
| 57016  | AKR1B10  | 6.55 |
| 152189 | CMTM8    | 6.54 |
| 7036   | TFR2     | 6.5  |
| 151473 | SLC16A14 | 6.49 |
| 344838 | PAQR9    | 6.49 |
| 55867  | SLC22A11 | 6.49 |
| 143662 | MUC15    | 6.46 |
| 55651  | NOLA2    | 6.45 |
| 118856 | MMP21    | 6.45 |
| 25816  | TNFAIP8  | 6.38 |
| 54101  | RIPK4    | 6.37 |
| 2070   | EYA4     | 6.34 |
| 387990 | UNQ9438  | 6.34 |
| 57190  | SEPN1    | 6.32 |
| 4155   | MBP      | 6.32 |

|        |          |      |
|--------|----------|------|
| 2527   | FUT5     | 8.22 |
| 284340 | UNQ473   | 8.22 |
| 283375 | SLC39A5  | 8.22 |
| 3242   | HPD      | 8.14 |
| 29953  | TRHDE    | 8.14 |
| 9576   | SPAG6    | 8.13 |
| 345    | APOC3    | 8.13 |
| 401040 | FLJ45964 | 8.12 |
| 1160   | CKMT2    | 8.12 |
| 2161   | F12      | 8.11 |
| 4188   | MDFI     | 8.11 |
| 60681  | FKBP10   | 8.08 |
| 183    | AGT      | 8.07 |
| 1582   | CYP8B1   | 8.07 |
| 1564   | CYP2D7P1 | 8.05 |
| 2949   | GSTM5    | 8.04 |
| 79170  | ATAD4    | 8.03 |
| 5104   | SERPINA5 | 8.01 |
| 116987 | CENTG2   | 7.98 |
| 10255  | HCG9     | 7.98 |
| 7123   | CLEC3B   | 7.98 |
| 2569   | GABRR1   | 7.94 |
| 246    | ALOX15   | 7.93 |
| 1565   | CYP2D6   | 7.92 |
| 54674  | LRRN3    | 7.9  |
| 10750  | GRAP     | 7.9  |
| 142683 | ITLN2    | 7.89 |
| 65012  | SLC26A10 | 7.88 |
| 710    | SERPING1 | 7.83 |
| 9496   | TBX4     | 7.83 |
| 7169   | TPM2     | 7.83 |
| 2746   | GLUD1    | 7.83 |
| 10623  | POLR3C   | 7.81 |
| 3485   | IGFBP2   | 7.8  |
| 64240  | ABCG5    | 7.8  |
| 51267  | CLEC1A   | 7.79 |
| 8630   | HSD17B6  | 7.79 |
| 10395  | DLC1     | 7.79 |
| 388591 | FLJ46380 | 7.76 |
| 487    | ATP2A1   | 7.74 |
| 50486  | GOS2     | 7.7  |
| 26508  | HEYL     | 7.69 |
| 23589  | CARHSP1  | 7.66 |
| 344    | APOC2    | 7.65 |

|        |                   |      |
|--------|-------------------|------|
| 55630  | SLC39A4           | 6.94 |
| 7046   | TGFBR1            | 6.93 |
| 51475  | CABP2             | 6.92 |
| 9290   | GPR55             | 6.92 |
| 6362   | CCL18             | 6.92 |
| 22796  | COG2              | 6.89 |
| 1325   | CORT              | 6.86 |
| 10850  | CCL27             | 6.86 |
| 126432 | FLJ45909          | 6.84 |
| 9536   | PTGES             | 6.83 |
| 347853 | TBX10             | 6.83 |
| 9358   | ITGBL1            | 6.82 |
| 71     | ACTG1             | 6.81 |
| 79932  | KIAA0319L         | 6.8  |
| 122622 | ADSSL1            | 6.8  |
| 1145   | CHRNE             | 6.8  |
| 5119   | PCOLN3            | 6.78 |
| 57165  | GJA12             | 6.78 |
| 4636   | MYL5              | 6.75 |
| 26526  | TSPAN16           | 6.75 |
| 7043   | TGFB3             | 6.75 |
| 1823   | DSC1              | 6.74 |
| 85007  | MGC15875          | 6.74 |
| 8839   | WISP2             | 6.73 |
| 8808   | IL1RL2            | 6.72 |
| 84951  | TNS4              | 6.72 |
| 6274   | S100A3            | 6.72 |
| 26476  | OR10J1            | 6.71 |
| 55850  | MDS032            | 6.71 |
| 124222 | PAQR4             | 6.71 |
| 400696 | LOC400696         | 6.67 |
| 338785 | KRT6L             | 6.66 |
| 91156  | DKFZp434B12<br>31 | 6.65 |
| 9047   | SH2D2A            | 6.65 |
| 56257  | BCDIN3            | 6.64 |
| 7124   | TNF               | 6.64 |
| 147949 | ZNF583            | 6.63 |
| 10636  | RGS14             | 6.6  |
| 973    | CD79A             | 6.59 |
| 4939   | OAS2              | 6.59 |
| 84467  | FBN3              | 6.58 |
| 79713  | U2AF1L4           | 6.57 |
| 23616  | SH3BP1            | 6.56 |

|        |          |      |
|--------|----------|------|
| 54546  | RNF186   | 6.32 |
| 5029   | P2RY2    | 6.32 |
| 10417  | SPON2    | 6.32 |
| 2295   | FOXF2    | 6.31 |
| 25953  | PNKD     | 6.29 |
| 4258   | MGST2    | 6.28 |
| 5213   | PFKM     | 6.27 |
| 3026   | HABP2    | 6.23 |
| 5947   | RBP1     | 6.22 |
| 2063   | NR2F6    | 6.22 |
| 26257  | NKX2-8   | 6.21 |
| 348094 | ANKDD1A  | 6.18 |
| 135932 | FLJ90586 | 6.16 |
| 84931  | FLJ14816 | 6.15 |
| 83758  | RBP5     | 6.08 |
| 317749 | DHRS4L2  | 6.07 |
| 2065   | ERBB3    | 6.07 |
| 124152 | MGC35048 | 6.06 |
| 4926   | NUMA1    | 6.06 |
| 56241  | SUSD2    | 6.04 |
| 3872   | KRT17    | 6.04 |
| 2624   | GATA2    | 6.03 |
| 23191  | CYFIP1   | 6.03 |
| 6097   | RORC     | 6.02 |
| 64240  | ABCG5    | 6.01 |
| 26270  | FBXO6    | 5.96 |
| 83999  | KREMEN1  | 5.96 |
| 9032   | TM4SF5   | 5.95 |
| 56925  | LXN      | 5.92 |
| 341883 | FLJ46156 | 5.92 |
| 1718   | DHCR24   | 5.91 |
| 3700   | ITIH4    | 5.91 |
| 54799  | MBTD1    | 5.9  |
| 3772   | KCNJ15   | 5.9  |
| 51066  | C3orf32  | 5.89 |
| 274    | BIN1     | 5.88 |
| 94241  | TP53INP1 | 5.87 |
| 7448   | VTN      | 5.86 |
| 3398   | ID2      | 5.86 |
| 94234  | FOXQ1    | 5.85 |
| 374969 | CCDC23   | 5.85 |
| 10659  | CUGBP2   | 5.84 |
| 5075   | PAX1     | 5.83 |

|        |         |      |
|--------|---------|------|
| 925    | CD8A    | 7.61 |
| 9376   | SLC22A8 | 7.61 |
| 1179   | CLCA1   | 7.56 |
| 971    | CD72    | 7.55 |
| 83959  | SLC4A11 | 7.53 |
| 7054   | TH      | 7.52 |
| 8858   | PROZ    | 7.52 |
| 4921   | DDR2    | 7.49 |
| 752    | FMNL1   | 7.47 |
| 4485   | MST1    | 7.47 |
| 5174   | PDZK1   | 7.46 |
| 434    | ASIP    | 7.46 |
| 5444   | PON1    | 7.45 |
| 160622 | GRASP   | 7.44 |
| 4815   | NINJ2   | 7.44 |
| 10783  | NEK6    | 7.4  |
| 113730 | KLHDC7B | 7.37 |
| 57716  | PRX     | 7.36 |
| 64403  | CDH24   | 7.33 |
| 56944  | OLFML3  | 7.33 |
| 203074 | UNQ9391 | 7.32 |
| 5730   | PTGDS   | 7.32 |
| 131377 | KBTBD5  | 7.31 |
| 51268  | PIPOX   | 7.3  |
| 64763  | ZNF574  | 7.3  |
| 27233  | SULT1C2 | 7.29 |
| 92591  | ASB16   | 7.28 |
| 2944   | GSTM1   | 7.27 |
| 29956  | LASS2   | 7.27 |
| 6582   | SLC22A2 | 7.27 |
| 51066  | C3orf32 | 7.26 |
| 92162  | TMEM88  | 7.26 |
| 8528   | DDO     | 7.24 |
| 9027   | NAT8    | 7.24 |
| 389084 | UNQ830  | 7.23 |
| 23550  | PSD4    | 7.23 |
| 22901  | ARSG    | 7.22 |
| 3004   | GZMM    | 7.22 |
| 25792  | CIZ1    | 7.21 |
| 84303  | CHCHD6  | 7.2  |
| 92305  | TMEM129 | 7.17 |
| 10344  | CCL26   | 7.15 |
| 146456 | TMED6   | 7.14 |

|        |                     |      |
|--------|---------------------|------|
| 324    | APC                 | 6.55 |
| 29947  | DNMT3L              | 6.54 |
| 57037  | ANKMY2              | 6.53 |
| 81553  | FAM49A              | 6.52 |
| 5202   | PFDN2               | 6.52 |
| 23704  | KCNE4               | 6.51 |
| 140446 | KRT6C               | 6.5  |
| 29937  | NENF                | 6.5  |
| 29933  | GPR132              | 6.49 |
| 2865   | FFAR3               | 6.48 |
| 9028   | RHBDL1              | 6.48 |
| 1553   | CYP2A13             | 6.48 |
| 1468   | SLC25A10            | 6.47 |
| 6663   | SOX10               | 6.47 |
| 116092 | DNTTIP1             | 6.4  |
| 3681   | ITGAD               | 6.4  |
| 7044   | LEFTY2              | 6.4  |
| 728    | C5AR1               | 6.38 |
| 5539   | PPY                 | 6.38 |
| 6764   | ST5                 | 6.37 |
| 3852   | KRT5                | 6.37 |
| 407977 | TNFSF12-<br>TNFSF13 | 6.36 |
| 9080   | CLDN9               | 6.34 |
| 9973   | CCS                 | 6.34 |
| 9119   | K6HF                | 6.33 |
| 3671   | ISLR                | 6.33 |
| 89910  | UBE3B               | 6.33 |
| 6504   | SLAMF1              | 6.32 |
| 54739  | BIRC4BP             | 6.29 |
| 8668   | EIF3S2              | 6.28 |
| 375061 | FAM89A              | 6.28 |
| 517    | ATP5G2              | 6.26 |
| 4653   | MYOC                | 6.26 |
| 126375 | FLJ38451            | 6.26 |
| 5133   | PDCD1               | 6.25 |
| 64089  | SNX16               | 6.24 |
| 7054   | TH                  | 6.23 |
| 2867   | FFAR2               | 6.23 |
| 3164   | NR4A1               | 6.22 |
| 1137   | CHRNA4              | 6.21 |
| 166336 | PRICKLE2            | 6.2  |
| 132014 | IL17RE              | 6.15 |
| 11170  | FAM107A             | 6.14 |

|        |          |      |
|--------|----------|------|
| 8111   | GPR68    | 5.83 |
| 4880   | NPPC     | 5.83 |
| 50604  | IL20     | 5.83 |
| 9963   | SLC23A1  | 5.83 |
| 25791  | NGEF     | 5.82 |
| 115584 | SLC5A11  | 5.82 |
| 9170   | EDG4     | 5.82 |
| 84733  | CBX2     | 5.82 |
| 64288  | ZNF323   | 5.81 |
| 92369  | SPSB4    | 5.8  |
| 3158   | HMGCS2   | 5.8  |
| 1116   | CHI3L1   | 5.8  |
| 149461 | CLDN19   | 5.8  |
| 81552  | ECOP     | 5.79 |
| 3880   | KRT19    | 5.79 |
| 1525   | CXADR    | 5.78 |
| 3239   | HOXD13   | 5.78 |
| 1124   | CHN2     | 5.78 |
| 3053   | SERPIND1 | 5.78 |
| 112817 | C10orf65 | 5.76 |
| 200150 | PLD5     | 5.75 |
| 10160  | FARP1    | 5.75 |
| 201799 | FLJ32028 | 5.73 |
| 23555  | TSPAN15  | 5.73 |
| 338    | APOB     | 5.71 |
| 64902  | AGXT2    | 5.71 |
| 283375 | SLC39A5  | 5.7  |
| 64816  | CYP3A43  | 5.7  |
| 1001   | CDH3     | 5.7  |
| 79170  | ATAD4    | 5.69 |
| 1952   | CELSR2   | 5.69 |
| 7851   | MALL     | 5.67 |
| 6943   | TCF21    | 5.65 |
| 115290 | FBXO17   | 5.64 |
| 79852  | ABHD9    | 5.63 |
| 6692   | SPINT1   | 5.62 |
| 79413  | ZBED2    | 5.62 |
| 5045   | FURIN    | 5.62 |
| 10040  | TOM1L1   | 5.61 |
| 338785 | KRT6L    | 5.6  |
| 83547  | RILP     | 5.58 |
| 58985  | IL22RA1  | 5.58 |
| 25891  | 2123     | 5.58 |

|        |           |      |
|--------|-----------|------|
| 27439  | CECR6     | 7.12 |
| 22918  | C1QR1     | 7.12 |
| 401508 | FLJ45202  | 7.08 |
| 79981  | FRMD1     | 7.08 |
| 3717   | JAK2      | 7.08 |
| 6036   | RNASE2    | 7.08 |
| 337960 | KRTAP13-3 | 7.07 |
| 79812  | MMRN2     | 7.07 |
| 140691 | RNF36     | 7.07 |
| 283298 | OLFML1    | 7.04 |
| 6356   | CCL11     | 7.04 |
| 43849  | KLK12     | 7.04 |
| 5602   | MAPK10    | 7.03 |
| 2209   | FCGR1A    | 7.03 |
| 5959   | RDH5      | 7.03 |
| 7471   | WNT1      | 7.02 |
| 252995 | FNDC5     | 7.01 |
| 10279  | PRSS16    | 7    |
| 51296  | SLC15A3   | 6.99 |
| 6688   | SPI1      | 6.95 |
| 112755 | STX1B2    | 6.93 |
| 127534 | GJB4      | 6.9  |
| 283807 | FBXL22    | 6.9  |
| 23187  | PHLDB1    | 6.89 |
| 6703   | SPRR2D    | 6.88 |
| 5066   | PAM       | 6.88 |
| 467    | ATF3      | 6.87 |
| 5972   | REN       | 6.86 |
| 11095  | ADAMTS8   | 6.86 |
| 7704   | ZBTB16    | 6.85 |
| 23436  | ELA3B     | 6.84 |
| 55891  | LENEP     | 6.84 |
| 284359 | IZUMO1    | 6.84 |
| 115584 | SLC5A11   | 6.83 |
| 8482   | SEMA7A    | 6.82 |
| 400841 | FLJ45832  | 6.82 |
| 2038   | EPB42     | 6.82 |
| 3956   | LGALS1    | 6.8  |
| 4063   | LY9       | 6.78 |
| 51435  | SCARA3    | 6.75 |
| 254910 | LCE5A     | 6.72 |
| 83992  | CTTNBP2   | 6.7  |
| 51663  | ZFR       | 6.69 |

|        |           |      |
|--------|-----------|------|
| 6693   | SPN       | 6.12 |
| 114898 | C1QTNF2   | 6.12 |
| 338323 | NALP14    | 6.11 |
| 956    | ENTPD3    | 6.1  |
| 10964  | IFI44L    | 6.09 |
| 57876  | MUC3B     | 6.08 |
| 23166  | STAB1     | 6.08 |
| 116447 | TOP1MT    | 6.06 |
| 5510   | PPP1R7    | 6.05 |
| 57449  | PLEKHG5   | 6.05 |
| 64423  | C14orf173 | 6.02 |
| 1621   | DBH       | 6.02 |
| 4351   | MPI       | 6.02 |
| 1943   | EFNA2     | 6.02 |
| 623    | BDKRB1    | 6.02 |
| 3663   | IRF5      | 6.01 |
| 10335  | MRVI1     | 6.01 |
| 339403 | RLN3R2    | 6    |
| 1847   | DUSP5     | 5.96 |
| 1805   | DPT       | 5.96 |
| 128272 | ARHGEF19  | 5.96 |
| 128178 | EDARADD   | 5.95 |
| 5652   | PRSS8     | 5.94 |
| 51744  | CD244     | 5.92 |
| 5552   | PRG1      | 5.92 |
| 126259 | MGC23244  | 5.91 |
| 2192   | FBLN1     | 5.9  |
| 153090 | DAB2IP    | 5.89 |
| 9796   | PHYHIP    | 5.87 |
| 3910   | LAMA4     | 5.86 |
| 283487 | LOC283487 | 5.86 |
| 7106   | TSPAN4    | 5.84 |
| 51110  | LACTB2    | 5.84 |
| 342666 | FLJ43826  | 5.83 |
| 6941   | TCF19     | 5.83 |
| 1991   | ELA2      | 5.83 |
| 4284   | MIP       | 5.82 |
| 29800  | ZDHHC1    | 5.8  |
| 8567   | MADD      | 5.8  |
| 10158  | PDZK1IP1  | 5.8  |
| 79188  | TMEM43    | 5.79 |
| 113828 | FAM83F    | 5.78 |
| 828    | CAPS      | 5.77 |
| 8581   | LY6D      | 5.76 |

|        |           |      |
|--------|-----------|------|
| 170692 | ADAMTS18  | 5.54 |
| 4688   | NCF2      | 5.54 |
| 2593   | GAMT      | 5.53 |
| 8764   | TNFRSF14  | 5.51 |
| 1825   | DSC3      | 5.51 |
| 1364   | CLDN4     | 5.5  |
| 5744   | PTHLH     | 5.5  |
| 83850  | FAM62C    | 5.48 |
| 9052   | GPRC5A    | 5.48 |
| 3425   | IDUA      | 5.46 |
| 81889  | FAHD1     | 5.46 |
| 80145  | NIF3L1BP1 | 5.46 |
| 148398 | SAMD11    | 5.45 |
| 130497 | OSR1      | 5.44 |
| 3761   | KCNJ4     | 5.43 |
| 63970  | P53AIP1   | 5.43 |
| 23213  | SULF1     | 5.43 |
| 23231  | KIAA0746  | 5.41 |
| 163702 | IL28RA    | 5.4  |
| 10874  | NMU       | 5.4  |
| 55937  | APOM      | 5.37 |
| 94235  | GNG8      | 5.36 |
| 7108   | TM7SF2    | 5.36 |
| 776    | CACNA1D   | 5.34 |
| 166012 | CHST13    | 5.32 |
| 7049   | TGFBR3    | 5.32 |
| 3852   | KRT5      | 5.31 |
| 3694   | ITGB6     | 5.3  |
| 93611  | FBXO44    | 5.3  |
| 6492   | SIM1      | 5.28 |
| 1041   | CDSN      | 5.28 |
| 259    | AMBP      | 5.28 |
| 116496 | C1orf24   | 5.27 |
| 30812  | SOX8      | 5.27 |
| 27022  | FOXD3     | 5.27 |
| 3822   | KLRC2     | 5.26 |
| 8973   | CHRNA6    | 5.26 |
| 25946  | ZNF385    | 5.23 |
| 57111  | RAB25     | 5.19 |
| 163183 | FLJ36445  | 5.19 |
| 25780  | RASGRP3   | 5.18 |
| 6493   | SIM2      | 5.17 |
| 23362  | PSD3      | 5.16 |
| 23516  | SLC39A14  | 5.14 |

|        |          |      |
|--------|----------|------|
| 92749  | MGC16372 | 6.69 |
| 5820   | PVT1     | 6.68 |
| 57139  | RGL3     | 6.68 |
| 4332   | MNDA     | 6.68 |
| 4130   | MAP1A    | 6.68 |
| 50649  | ARHGEF4  | 6.67 |
| 84561  | SLC12A8  | 6.66 |
| 5081   | PAX7     | 6.66 |
| 3211   | HOXB1    | 6.65 |
| 430    | ASCL2    | 6.65 |
| 2547   | XRCC6    | 6.64 |
| 149345 | TMEM58   | 6.63 |
| 7287   | TULP1    | 6.63 |
| 283422 | C12orf36 | 6.63 |
| 4725   | NDUFS5   | 6.61 |
| 347741 | OTOP3    | 6.6  |
| 55024  | BANK1    | 6.59 |
| 285    | ANGPT2   | 6.57 |
| 1138   | CHRNA5   | 6.57 |
| 94274  | PPP1R14A | 6.56 |
| 85481  | PSKH2    | 6.55 |
| 114990 | SLITL2   | 6.55 |
| 255352 | C10orf93 | 6.54 |
| 1586   | CYP17A1  | 6.53 |
| 275    | AMT      | 6.53 |
| 57699  | CPNE5    | 6.51 |
| 25791  | NGEF     | 6.51 |
| 84275  | MGC4399  | 6.5  |
| 11167  | FSTL1    | 6.5  |
| 3213   | HOXB3    | 6.49 |
| 64843  | ISL2     | 6.47 |
| 8483   | CILP     | 6.47 |
| 3892   | KRTHB6   | 6.47 |
| 7480   | WNT10B   | 6.45 |
| 144423 | GLT1D1   | 6.42 |
| 343035 | C1orf36  | 6.41 |
| 197407 | ZNF553   | 6.41 |
| 1805   | DPT      | 6.4  |
| 1025   | CDK9     | 6.39 |
| 8718   | TNFRSF25 | 6.37 |
| 146722 | CD300LF  | 6.36 |
| 6278   | S100A7   | 6.34 |
| 9965   | FGF19    | 6.33 |
| 359    | AQP2     | 6.32 |

|        |           |      |
|--------|-----------|------|
| 5368   | PNOC      | 5.75 |
| 5745   | PTHR1     | 5.75 |
| 84690  | SPATA22   | 5.73 |
| 150248 | C22orf15  | 5.71 |
| 3868   | KRT16     | 5.7  |
| 22921  | MSRB2     | 5.7  |
| 9123   | SLC16A3   | 5.69 |
| 5913   | RAPSN     | 5.69 |
| 54020  | SLC37A1   | 5.68 |
| 149699 | FAM112A   | 5.67 |
| 8789   | FBP2      | 5.67 |
| 11269  | DDX19B    | 5.67 |
| 2980   | GUCA2A    | 5.65 |
| 57333  | RCN3      | 5.65 |
| 10669  | CGREF1    | 5.64 |
| 6788   | STK3      | 5.64 |
| 6610   | SMPD2     | 5.64 |
| 1549   | CYP2A7    | 5.62 |
| 2779   | GNAT1     | 5.62 |
| 5738   | PTGFRN    | 5.61 |
| 2525   | FUT3      | 5.6  |
| 5871   | MAP4K2    | 5.6  |
| 122060 | FLJ30046  | 5.59 |
| 64174  | DPEP2     | 5.59 |
| 9404   | LPXN      | 5.57 |
| 4486   | MST1R     | 5.57 |
| 26232  | FBXO2     | 5.56 |
| 79086  | MGC2747   | 5.56 |
| 79758  | FLJ13639  | 5.55 |
| 50626  | CYHR1     | 5.54 |
| 1357   | CPA1      | 5.53 |
| 54     | ACP5      | 5.5  |
| 83552  | MFRP      | 5.5  |
| 8906   | AP1G2     | 5.5  |
| 170589 | GPHA2     | 5.5  |
| 339789 | LOC339789 | 5.49 |
| 1056   | CEL       | 5.49 |
| 4878   | NPPA      | 5.48 |
| 55340  | GIMAP5    | 5.47 |
| 5304   | PIP       | 5.47 |
| 921    | CD5       | 5.47 |
| 27004  | TCL6      | 5.46 |
| 8930   | MBD4      | 5.44 |
| 3460   | IFNGR2    | 5.44 |

|        |          |      |
|--------|----------|------|
| 9743   | RICS     | 5.14 |
| 189    | AGXT     | 5.13 |
| 79962  | FLJ13236 | 5.12 |
| 8840   | WISP1    | 5.12 |
| 136541 | TRY1     | -5.1 |
| 91746  | YTHDC1   | -5.1 |
| 7106   | TSPAN4   | -5.1 |
| 26160  | IFT172   | -5.1 |
| 6484   | ST3GAL4  | -5.1 |
| 81696  | OR5V1    | -5.1 |
| 83992  | CTTNBP2  | -5.1 |
| 5136   | PDE1A    | -5.1 |
| 11086  | ADAM29   | -5.1 |
| 3575   | IL7R     | -5.1 |
| 6361   | CCL17    | -5.1 |
| 4166   | CHST6    | -5.1 |
| 2848   | GPR25    | -5.1 |
| 3305   | HSPA1L   | -5.1 |
| 317716 | RP11-    | -5.1 |
| 9987   | HNRPDL   | -5.2 |
| 5452   | POU2F2   | -5.2 |
| 10648  | SCGB1D1  | -5.2 |
| 5156   | PDGFRA   | -5.2 |
| 6327   | SCN2B    | -5.2 |
| 153579 | BTNL9    | -5.2 |
| 7594   | ZNF43    | -5.2 |
| 130560 | SPATA3   | -5.2 |
| 1186   | CLCN7    | -5.2 |
| 8832   | CD84     | -5.2 |
| 3674   | ITGA2B   | -5.2 |
| 64284  | RAB17    | -5.2 |
| 7015   | TERT     | -5.2 |
| 284618 | C1orf104 | -5.2 |
| 10887  | PROKR1   | -5.2 |
| 128859 | BPIL3    | -5.2 |
| 2003   |          | -5.2 |
| 146433 | MGC34647 | -5.2 |
| 1188   | CLCNKB   | -5.2 |
| 3982   | LIM2     | -5.2 |
| 80739  | C6orf25  | -5.2 |
| 145946 | SPATA8   | -5.2 |
| 10603  | APS      | -5.2 |
| 57381  | RHOJ     | -5.2 |
| 80347  | COASY    | -5.2 |

|        |          |      |
|--------|----------|------|
| 84929  | FIBCD1   | 6.31 |
| 51274  | KLF3     | 6.31 |
| 9942   | XYLB     | 6.3  |
| 2745   | GLRX     | 6.3  |
| 83596  | BCL2L12  | 6.29 |
| 290    | ANPEP    | 6.29 |
| 3270   | HRC      | 6.29 |
| 962    | CD48     | 6.29 |
| 6663   | SOX10    | 6.29 |
| 2837   | UTS2R    | 6.29 |
| 9020   | MAP3K14  | 6.28 |
| 83597  | RTP3     | 6.27 |
| 7448   | VTN      | 6.27 |
| 7486   | WRN      | 6.26 |
| 56981  | PRDM11   | 6.26 |
| 400165 | FLJ26443 | 6.26 |
| 2620   | GAS2     | 6.25 |
| 10990  | LILRB5   | 6.25 |
| 128414 | C20orf58 | 6.23 |
| 496    | ATP4B    | 6.22 |
| 1442   | CSH1     | 6.21 |
| 162333 | RNF190   | 6.21 |
| 55228  | FLJ10781 | 6.21 |
| 2898   | GRIK2    | 6.21 |
| 57447  | NDRG2    | 6.18 |
| 1135   | CHRNA2   | 6.16 |
| 84258  | SYT3     | 6.16 |
| 6037   | RNASE3   | 6.15 |
| 65108  | MARCKSL1 | 6.15 |
| 55908  | LOC55908 | 6.14 |
| 13     | AADAC    | 6.13 |
| 433    | ASGR2    | 6.12 |
| 204219 | LASS3    | 6.1  |
| 6480   | ST6GAL1  | 6.1  |
| 221188 | GPR114   | 6.1  |
| 23500  | DAAM2    | 6.1  |
| 3050   | HBZ      | 6.09 |
| 56923  | NMUR2    | 6.08 |
| 84310  | MGC11257 | 6.08 |
| 5005   | ORM2     | 6.08 |
| 23321  | TRIM2    | 6.08 |
| 112817 | C10orf65 | 6.08 |
| 219539 | YPEL4    | 6.08 |
| 5122   | PCSK1    | 6.07 |

|        |           |      |
|--------|-----------|------|
| 10462  | CLEC10A   | 5.43 |
| 6444   | SGCD      | 5.43 |
| 65095  | FLJ12949  | 5.42 |
| 4689   | NCF4      | 5.41 |
| 706    | BZRP      | 5.39 |
| 150244 | FLJ31568  | 5.39 |
| 55231  | FLJ10786  | 5.39 |
| 917    | CD3G      | 5.39 |
| 6355   | CCL8      | 5.39 |
| 2217   | FCGRT     | 5.37 |
| 91227  | GGTL4     | 5.36 |
| 59     | ACTA2     | 5.36 |
| 2036   | EPB41L1   | 5.34 |
| 56920  | SEMA3G    | 5.33 |
| 54715  | A2BP1     | 5.32 |
| 50507  | NOX4      | 5.32 |
| 79414  | LRFN3     | 5.32 |
| 54777  | C10orf92  | 5.31 |
| 1811   | SLC26A3   | 5.3  |
| 7809   | BSND      | 5.3  |
| 7169   | TPM2      | 5.3  |
| 6284   | S100A13   | 5.28 |
| 161247 | LOC161247 | -5.3 |
| 2488   | FSHB      | -5.3 |
| 27283  | TINAG     | -5.3 |
| 7869   | SEMA3B    | -5.3 |
| 6909   | TBX2      | -5.3 |
| 64577  | ALDH8A1   | -5.3 |
| 307    | ANXA4     | -5.3 |
| 6528   | SLC5A5    | -5.3 |
| 132720 | FLJ39370  | -5.3 |
| 8346   | HIST1H2BI | -5.3 |
| 8785   | MATN4     | -5.3 |
| 63934  | ZNF667    | -5.3 |
| 6942   | TCF20     | -5.4 |
| 3061   | HCRTR1    | -5.4 |
| 53841  | MUCDHL    | -5.4 |
| 142680 | SLC34A3   | -5.4 |
| 91662  | NALP12    | -5.4 |
| 25799  | ZNF324    | -5.4 |
| 283310 | FLJ90579  | -5.4 |
| 229    | ALDOB     | -5.4 |
| 9543   | PUNC      | -5.4 |
| 3203   | HOXA6     | -5.4 |

|        |           |      |
|--------|-----------|------|
| 491    | ATP2B2    | -5.2 |
| 358    | AQP1      | -5.2 |
| 5341   | PLEK      | -5.2 |
| 5731   | PTGER1    | -5.2 |
| 10544  | PROCR     | -5.3 |
| 6696   | SPP1      | -5.3 |
| 23385  | NCSTN     | -5.3 |
| 623    | BDKRB1    | -5.3 |
| 4359   | MPZ       | -5.3 |
| 338872 | MGC48915  | -5.3 |
| 5122   | PCSK1     | -5.3 |
| 29127  | RACGAP1   | -5.3 |
| 914    | CD2       | -5.3 |
| 1991   | ELA2      | -5.3 |
| 57715  | SEMA4G    | -5.3 |
| 1014   | CDH16     | -5.3 |
| 126248 | LOC126248 | -5.3 |
| 2191   | FAP       | -5.3 |
| 5920   | RARRES3   | -5.3 |
| 64761  | PARP12    | -5.3 |
| 4477   | MSMB      | -5.3 |
| 79758  | FLJ13639  | -5.3 |
| 115560 | ZNF501    | -5.3 |
| 2918   | GRM8      | -5.3 |
| 374403 | TBC1D10C  | -5.3 |
| 283849 | LOC283849 | -5.3 |
| 10423  | CDIPT     | -5.3 |
| 126792 | B3GALT6   | -5.3 |
| 84218  | TBC1D3    | -5.3 |
| 27233  | SULT1C2   | -5.3 |
| 79605  | PGBD5     | -5.3 |
| 2837   | UTS2R     | -5.3 |
| 89858  | SIGLEC12  | -5.3 |
| 9706   | ULK2      | -5.3 |
| 6876   | TAGLN     | -5.3 |
| 6710   | SPTB      | -5.3 |
| 6538   | SLC6A11   | -5.3 |
| 89857  | KLHL6     | -5.3 |
| 3663   | IRF5      | -5.3 |
| 4316   | MMP7      | -5.3 |
| 5730   | PTGDS     | -5.3 |
| 4350   | MPG       | -5.3 |
| 5575   | PRKAR1B   | -5.4 |
| 200523 | FLJ25369  | -5.4 |

|        |           |      |
|--------|-----------|------|
| 93377  | TMEM10    | 6.07 |
| 3002   | GZMB      | 6.07 |
| 6320   | CLEC11A   | 6.06 |
| 283234 | FLJ37970  | 6.06 |
| 80342  | TRAF3IP3  | 6.03 |
| 115362 | GBP5      | 6.03 |
| 4586   | MUC5AC    | 6.03 |
| 150209 | AIFL      | 6.03 |
| 336    | APOA2     | 6.02 |
| 266629 | SEC14L3   | 6    |
| 51208  | CLDN18    | 6    |
| 3912   | LAMB1     | 5.99 |
| 6699   | SPRR1B    | 5.98 |
| 2862   | MLNR      | 5.94 |
| 337880 | KRTAP11-1 | 5.93 |
| 3902   | LAG3      | 5.92 |
| 9002   | F2RL3     | 5.91 |
| 10044  | SH2D3C    | 5.91 |
| 5140   | PDE3B     | 5.9  |
| 9783   | RIMS3     | 5.89 |
| 128864 | C20orf144 | 5.89 |
| 114899 | C1QTNF3   | 5.88 |
| 4340   | MOG       | 5.88 |
| 26469  | PTPN18    | 5.87 |
| 30814  | PLA2G2E   | 5.86 |
| 5778   | PTPN7     | 5.86 |
| 9060   | PAPSS2    | 5.85 |
| 3000   | GUCY2D    | 5.85 |
| 388341 | C17orf76  | 5.84 |
| 5995   | RGR       | 5.83 |
| 283171 | C11orf44  | 5.83 |
| 5795   | PTPRJ     | 5.83 |
| 10538  | BATF      | 5.82 |
| 4166   | CHST6     | 5.82 |
| 284756 | FLJ33860  | 5.82 |
| 8875   | VNN2      | 5.82 |
| 5313   | PKLR      | 5.82 |
| 57473  | GM632     | 5.81 |
| 121391 | K6IRS4    | 5.8  |
| 3034   | HAL       | 5.8  |
| 25814  | ATXN10    | 5.79 |
| 189    | AGXT      | 5.79 |
| 85291  | KRTAP4-2  | 5.79 |
| 9358   | ITGBL1    | 5.79 |



|        |          |      |
|--------|----------|------|
| 259232 | VGCNL1   | -5.4 |
| 57473  | GM632    | -5.4 |
| 9557   | CHD1L    | -5.4 |
| 9496   | TBX4     | -5.4 |
| 84733  | CBX2     | -5.4 |
| 79152  | FA2H     | -5.4 |
| 6514   | SLC2A2   | -5.4 |
| 285367 | RPUSD3   | -5.4 |
| 3643   | INSR     | -5.4 |
| 54915  | YTHDF1   | -5.5 |
| 3855   | KRT7     | -5.5 |
| 85329  | LGALS12  | -5.5 |
| 122970 | ACOT4    | -5.5 |
| 26112  | CCDC69   | -5.5 |
| 55350  | VNN3     | -5.5 |
| 6943   | TCF21    | -5.5 |
| 716    | C1S      | -5.5 |
| 252995 | FNDC5    | -5.5 |
| 158056 | MAMDC4   | -5.5 |
| 1589   | CYP21A2  | -5.5 |
| 6425   | SFRP5    | -5.5 |
| 164091 | PAQR7    | -5.5 |
| 51513  | ETV7     | -5.6 |
| 84856  | MGC16291 | -5.6 |
| 339488 | TFAP2E   | -5.6 |
| 3822   | KLRC2    | -5.6 |
| 1271   | CNTFR    | -5.6 |
| 10290  | APEG1    | -5.6 |
| 27232  | GNMT     | -5.6 |
| 5493   | PPL      | -5.6 |
| 399717 | FLJ45983 | -5.6 |
| 727    | C5       | -5.6 |
| 3131   | HLF      | -5.6 |
| 1406   | CRX      | -5.6 |
| 399980 | C11orf39 | -5.6 |
| 202151 | FLJ25422 | -5.6 |
| 3752   | KCND3    | -5.6 |
| 490    | ATP2B1   | -5.6 |
| 1788   | DNMT3A   | -5.6 |
| 64405  | CDH22    | -5.6 |
| 10406  | WFDC2    | -5.6 |
| 2326   | FMO1     | -5.6 |
| 23471  | TRAM1    | -5.6 |
| 353500 | BMP8A    | -5.6 |
| 151278 | FLJ32447 | -5.7 |

|        |           |      |
|--------|-----------|------|
| 4340   | MOG       | -5.4 |
| 22954  | TRIM32    | -5.4 |
| 342510 | CD300E    | -5.4 |
| 84645  | C22orf23  | -5.4 |
| 83902  | KRTAP17-1 | -5.4 |
| 89795  | NAV3      | -5.4 |
| 390212 | GPR152    | -5.4 |
| 341567 | H1T2      | -5.4 |
| 27180  | SIGLEC9   | -5.4 |
| 4991   | OR1D2     | -5.4 |
| 3373   | HYAL1     | -5.4 |
| 90102  | PHLDB2    | -5.4 |
| 9918   | CNAP1     | -5.4 |
| 9153   | SLC28A2   | -5.4 |
| 6037   | RNASE3    | -5.4 |
| 83742  | MARVELD1  | -5.4 |
| 81569  | ACTL8     | -5.4 |
| 3265   | HRAS      | -5.4 |
| 6749   | SSRP1     | -5.4 |
| 54866  | PPP1R14D  | -5.5 |
| 53831  | GPR84     | -5.5 |
| 84701  | COX4I2    | -5.5 |
| 9811   | KIAA0427  | -5.5 |
| 5545   | PRB4      | -5.5 |
| 2784   | GNB3      | -5.5 |
| 83443  | SF3B5     | -5.5 |
| 90480  | GADD45GI  | -5.5 |
| 339669 | MGC35206  | -5.5 |
| 11250  | GPR45     | -5.5 |
| 6366   | CCL21     | -5.5 |
| 6017   | RLBP1     | -5.5 |
| 10507  | SEMA4D    | -5.5 |
| 4607   | MYBPC3    | -5.5 |
| 245909 | DEFB106A  | -5.5 |
| 375686 | SPATC1    | -5.5 |
| 10538  | BATF      | -5.5 |
| 126353 | C19orf21  | -5.5 |
| 3452   | IFNA21    | -5.5 |
| 11105  | PRDM7     | -5.5 |
| 5146   | PDE6C     | -5.5 |
| 151254 | ALS2CR11  | -5.5 |
| 140883 | SUHW2     | -5.6 |
| 5967   | REG1A     | -5.6 |
| 389458 | LOC389458 | -5.6 |
| 51350  | KRT2B     | -5.6 |

|        |           |      |
|--------|-----------|------|
| 57381  | RHOJ      | 5.77 |
| 9961   | MVP       | 5.77 |
| 80740  | LY6G6C    | 5.76 |
| 56270  | WDR45L    | 5.76 |
| 7033   | TFF3      | 5.75 |
| 83888  | KSP37     | 5.75 |
| 1510   | CTSE      | 5.74 |
| 128488 | WFDC12    | 5.74 |
| 134285 | PRP2      | 5.73 |
| 90102  | PHLDB2    | 5.73 |
| 54861  | SNRK      | 5.73 |
| 55679  | LIMS2     | 5.73 |
| 5970   | RELA      | 5.72 |
| 57804  | POLD4     | 5.72 |
| 6360   | CCL16     | 5.71 |
| 6253   | RTN2      | 5.69 |
| 63827  | BCAN      | 5.68 |
| 283849 | LOC283849 | 5.67 |
| 2784   | GNB3      | 5.67 |
| 161198 | CLEC14A   | 5.65 |
| 4043   | LRPAP1    | 5.65 |
| 54345  | SOX18     | 5.64 |
| 1088   | CEACAM8   | 5.64 |
| 1788   | DNMT3A    | 5.64 |
| 147429 | C18orf16  | 5.63 |
| 51341  | ZBTB7A    | 5.62 |
| 144193 | AMDHD1    | 5.62 |
| 117194 | MRGPRX2   | 5.62 |
| 387332 | TBPL2     | 5.62 |
| 83482  | SCRT1     | 5.61 |
| 10933  | MORF4L1   | 5.61 |
| 7052   | TGM2      | 5.6  |
| 56301  | SLC7A10   | 5.59 |
| 84465  | MEGF11    | 5.59 |
| 9701   | SAPS2     | 5.58 |
| 55640  | C14orf58  | 5.58 |
| 23569  | PADI4     | 5.58 |
| 2335   | FN1       | 5.58 |
| 27180  | SIGLEC9   | 5.57 |
| 11185  | INMT      | 5.56 |
| 3273   | HRG       | 5.55 |
| 1589   | CYP21A2   | 5.55 |
| 84767  | TRIM51    | 5.54 |
| 54596  | ECAT11    | 5.54 |
| 150350 | FLJ25421  | 5.54 |

|        |          |      |
|--------|----------|------|
| 51659  | Pfs2     | -5.7 |
| 2905   | GRIN2C   | -5.7 |
| 2444   | FRK      | -5.7 |
| 5476   | PPGB     | -5.7 |
| 1401   | CRP      | -5.7 |
| 11337  | GABARAP  | -5.7 |
| 130497 | OSR1     | -5.7 |
| 8736   | MYOM1    | -5.7 |
| 3241   | HPCAL1   | -5.7 |
| 6045   | RNF2     | -5.7 |
| 6694   | SPP2     | -5.8 |
| 27439  | CECR6    | -5.8 |
| 9214   | FAIM3    | -5.8 |
| 6035   | RNASE1   | -5.8 |
| 2686   | GGTL3    | -5.8 |
| 3902   | LAG3     | -5.8 |
| 2981   | GUCA2B   | -5.8 |
| 388759 | FLJ45717 | -5.8 |
| 1441   | CSF3R    | -5.8 |
| 4055   | LTBR     | -5.8 |
| 8871   | SYNJ2    | -5.8 |
| 5137   | PDE1C    | -5.8 |
| 118471 | PRAP1    | -5.8 |
| 1442   | CSH1     | -5.8 |
| 1118   | CHIT1    | -5.8 |
| 54546  | RNF186   | -5.9 |
| 8764   | TNFRSF14 | -5.9 |
| 164284 | FLJ90166 | -5.9 |
| 80350  | LPAL2    | -5.9 |
| 220001 | VWCE     | -5.9 |
| 6523   | SLC5A1   | -5.9 |
| 57580  | PREX1    | -5.9 |
| 3426   | CFI      | -5.9 |
| 5909   | RAP1GA1  | -5.9 |
| 5711   | PSMD5    | -5.9 |
| 5947   | RBP1     | -6   |
| 3755   | KCNG1    | -6   |
| 5346   | PLIN     | -6   |
| 28965  | SLC27A6  | -6   |
| 7179   | TPTE     | -6   |
| 5313   | PKLR     | -6   |
| 6539   | SLC6A12  | -6   |
| 6690   | SPINK1   | -6   |
| 6392   | SDHD     | -6   |

|        |          |      |
|--------|----------|------|
| 353140 | LCE2C    | -5.6 |
| 5968   | REG1B    | -5.6 |
| 23351  | KIAA0323 | -5.6 |
| 759    | CA1      | -5.6 |
| 4261   | CIITA    | -5.6 |
| 828    | CAPS     | -5.6 |
| 10225  | CD96     | -5.6 |
| 4133   | MAP2     | -5.6 |
| 85480  | TSLP     | -5.6 |
| 128861 | C20orf71 | -5.6 |
| 364    | AQP7     | -5.6 |
| 148479 | PHF13    | -5.6 |
| 9582   | APOBEC3B | -5.6 |
| 6203   | RPS9     | -5.6 |
| 2866   | GPR42    | -5.6 |
| 3535   |          | -5.6 |
| 3437   | IFIT3    | -5.6 |
| 10803  | CCR9     | -5.7 |
| 10277  | UBE4B    | -5.7 |
| 284369 | FLJ40235 | -5.7 |
| 57573  | ZNF471   | -5.7 |
| 132141 | IQCF1    | -5.7 |
| 199786 | BCNP1    | -5.7 |
| 4687   | NCF1     | -5.7 |
| 6699   | SPRR1B   | -5.7 |
| 1943   | EFNA2    | -5.7 |
| 10738  | RFPL3    | -5.7 |
| 8352   | HIST1H3C | -5.7 |
| 23542  | MAPK8IP2 | -5.7 |
| 284415 | UNQ3033  | -5.7 |
| 113802 | C1orf59  | -5.7 |
| 9021   | SOCS3    | -5.7 |
| 64066  | MMP27    | -5.7 |
| 3434   | IFIT1    | -5.7 |
| 90423  | ATP6V1E2 | -5.7 |
| 5988   | RFPL1    | -5.7 |
| 79854  | FLJ22639 | -5.7 |
| 4807   | NHLH1    | -5.7 |
| 266553 | OFCC1    | -5.7 |
| 6404   | SELPLG   | -5.7 |
| 284680 | C1orf111 | -5.7 |
| 124961 | ZFP3     | -5.8 |
| 9172   | MYOM2    | -5.8 |
| 6367   | CCL22    | -5.8 |

|        |          |      |
|--------|----------|------|
| 81492  | RSHL1    | 5.53 |
| 629    | CFB      | 5.53 |
| 57088  | PLSCR4   | 5.53 |
| 23649  | POLA2    | 5.53 |
| 3249   | HPN      | 5.52 |
| 84648  | LCE3D    | 5.52 |
| 18     | ABAT     | 5.52 |
| 84931  | FLJ14816 | 5.51 |
| 9744   | CENTB1   | 5.51 |
| 622    | BDH      | 5.49 |
| 586    | BCAT1    | 5.48 |
| 90853  | SPOCD1   | 5.48 |
| 2694   | GIF      | 5.48 |
| 7036   | TFR2     | 5.48 |
| 1339   | COX6A2   | 5.47 |
| 766    | CA7      | 5.47 |
| 37     | ACADVL   | 5.47 |
| 118425 | GDEP     | 5.46 |
| 187    | AGTRL1   | 5.46 |
| 2900   | GRIK4    | 5.45 |
| 1773   | DNASE1   | 5.45 |
| 134    | ADORA1   | 5.44 |
| 8572   | PDLIM4   | 5.44 |
| 5452   | POU2F2   | 5.44 |
| 90070  | LACRT    | 5.43 |
| 29949  | IL19     | 5.43 |
| 8841   | HDAC3    | 5.42 |
| 80201  | HKDC1    | 5.4  |
| 3851   | KRT4     | 5.39 |
| 121512 | FGD4     | 5.39 |
| 5968   | REG1B    | 5.38 |
| 140856 | C20orf79 | 5.37 |
| 4638   | MYLK     | 5.37 |
| 117156 | SCGB3A2  | 5.37 |
| 5311   | PKD2     | 5.36 |
| 4855   | NOTCH4   | 5.36 |
| 23562  | CLDN14   | 5.36 |
| 4133   | MAP2     | 5.36 |
| 59341  | TRPV4    | 5.35 |
| 164781 | WDR69    | 5.35 |
| 92579  | G6PC3    | 5.35 |
| 2178   | FANCE    | 5.35 |
| 6531   | SLC6A3   | 5.34 |
| 157769 | FAM91A1  | 5.34 |

|        |             |      |
|--------|-------------|------|
| 283383 | GPR133      | -6   |
| 5140   | PDE3B       | -6.1 |
| 2099   | ESR1        | -6.1 |
| 7137   | TNNI3       | -6.1 |
| 350    | APOH        | -6.1 |
| 2027   | ENO3        | -6.1 |
| 401105 | FLJ42393    | -6.1 |
| 79870  | BAALC       | -6.1 |
| 25900  | HOM-TES-103 | -6.1 |
| 5077   | PAX3        | -6.1 |
| 83595  | SOX7        | -6.1 |
| 3299   | HSF4        | -6.1 |
| 162333 | RNF190      | -6.1 |
| 83999  | KREMEN1     | -6.2 |
| 129807 | NEU4        | -6.2 |
| 64757  | MOSC1       | -6.2 |
| 200634 | KRTCAP3     | -6.2 |
| 3200   | HOXA3       | -6.2 |
| 29993  | PACSIN1     | -6.2 |
| 11346  | SYNPO       | -6.2 |
| 3354   | HTR1E       | -6.2 |
| 197257 | LDHD        | -6.2 |
| 91703  | ACY3        | -6.2 |
| 130013 | ACMSD       | -6.2 |
| 3889   | KRTHB3      | -6.3 |
| 6935   | TCF8        | -6.3 |
| 6799   | SULT1A2     | -6.3 |
| 7498   | XDH         | -6.3 |
| 135932 | FLJ90586    | -6.3 |
| 80833  | APOL3       | -6.3 |
| 84267  | C9orf64     | -6.3 |
| 4357   | MPST        | -6.3 |
| 25780  | RASGRP3     | -6.3 |
| 56241  | SUSD2       | -6.4 |
| 2153   | F5          | -6.4 |
| 3987   | LIMS1       | -6.4 |
| 84699  | CREB3L3     | -6.4 |
| 3669   | ISG20       | -6.4 |
| 4185   | ADAM11      | -6.4 |
| 3386   | ICAM4       | -6.4 |
| 8614   | STC2        | -6.4 |
| 55620  | STAP2       | -6.4 |
| 8942   | KYNU        | -6.5 |

|        |           |      |
|--------|-----------|------|
| 126123 | SCRL      | -5.8 |
| 220074 | LRRC51    | -5.8 |
| 57094  | CPA6      | -5.8 |
| 254950 | KRTAP15-1 | -5.8 |
| 9592   | IER2      | -5.8 |
| 7681   | MKRN3     | -5.8 |
| 5959   | RDH5      | -5.8 |
| 5510   | PPP1R7    | -5.8 |
| 168391 | GALNTL5   | -5.8 |
| 22874  | PLEKHA6   | -5.8 |
| 841    | CASP8     | -5.8 |
| 60676  | PAPPA2    | -5.8 |
| 8309   | ACOX2     | -5.8 |
| 7136   | TNNI2     | -5.8 |
| 55423  | SIRPB2    | -5.8 |
| 55898  | UNC45A    | -5.8 |
| 165100 | MGC35154  | -5.8 |
| 8482   | SEMA7A    | -5.8 |
| 339403 | RLN3R2    | -5.8 |
| 374977 | C1orf175  | -5.8 |
| 3108   | HLA-DMA   | -5.8 |
| 55303  | GIMAP4    | -5.8 |
| 3744   | KCNA10    | -5.9 |
| 6275   | S100A4    | -5.9 |
| 116985 | CENTD2    | -5.9 |
| 55329  | MNS1      | -5.9 |
| 126402 | FLJ40365  | -5.9 |
| 54453  | RIN2      | -5.9 |
| 1535   | CYBA      | -5.9 |
| 5337   | PLD1      | -5.9 |
| 337879 | KRTAP8-1  | -5.9 |
| 121214 | SDR-O     | -5.9 |
| 5232   | PGK2      | -5.9 |
| 282991 | BLOC1S2   | -5.9 |
| 5149   | PDE6H     | -5.9 |
| 23769  | FLRT1     | -5.9 |
| 1544   | CYP1A2    | -5.9 |
| 1259   | CNGA1     | -5.9 |
| 353131 | LCE1A     | -5.9 |
| 79541  | OR2A4     | -5.9 |
| 23434  | C3orf27   | -5.9 |
| 79086  | MGC2747   | -5.9 |
| 339779 | MGC44505  | -5.9 |

|        |           |      |
|--------|-----------|------|
| 85397  | RGS8      | 5.33 |
| 163933 | FAM43B    | 5.32 |
| 79058  | ASPSCR1   | 5.32 |
| 2068   | ERCC2     | 5.32 |
| 10882  | C1QL1     | 5.32 |
| 7425   | VGf       | 5.31 |
| 60489  | APOBEC3G  | 5.3  |
| 55303  | GIMAP4    | 5.3  |
| 127845 | GOLT1A    | 5.29 |
| 79672  | FN3KRP    | 5.29 |
| 51706  | CYB5R1    | 5.29 |
| 7305   | TYROBP    | 5.29 |
| 341116 | MS4A10    | 5.29 |
| 8871   | SYNJ2     | 5.28 |
| 80774  | LIMD2     | 5.27 |
| 266553 | OFCC1     | 5.27 |
| 80228  | C7orf19   | 5.26 |
| 2912   | GRM2      | 5.26 |
| 23558  | WBP2      | 5.26 |
| 140876 | C20orf175 | 5.25 |
| 23601  | CLEC5A    | 5.25 |
| 84695  | LOXL3     | 5.25 |
| 527    | ATP6VOC   | 5.24 |
| 10326  | SIRPB1    | 5.24 |
| 3949   | LDLR      | 5.24 |
| 10637  | LEFTY1    | 5.24 |
| 10382  | TUBB4     | 5.23 |
| 170850 | KCNG3     | 5.22 |
| 389114 | ZNF662    | 5.22 |
| 4295   | MLN       | 5.21 |
| 126393 | HSPB6     | 5.21 |
| 10093  | ARPC4     | 5.2  |
| 11094  | C9orf7    | 5.2  |
| 26580  | BSCL2     | 5.2  |
| 90861  | C16orf34  | 5.2  |
| 11093  | ADAMTS13  | 5.19 |
| 1757   | SARDH     | 5.18 |
| 341    | APOC1     | 5.18 |
| 353142 | LCE3A     | 5.18 |
| 10136  | ELA3A     | 5.18 |
| 121599 | SPIC      | -5.2 |
| 10529  | NEBL      | -5.2 |
| 117155 | CATSPER2  | -5.2 |

|        |          |      |
|--------|----------|------|
| 54799  | MBTD1    | -6.5 |
| 863    | CBFA2T3  | -6.5 |
| 284186 | TMEM105  | -6.5 |
| 60436  | TGIF2    | -6.5 |
| 9099   | USP2     | -6.5 |
| 54436  | SH3TC1   | -6.5 |
| 388428 | FLJ44861 | -6.5 |
| 84931  | FLJ14816 | -6.5 |
| 115701 | HAK      | -6.5 |
| 9675   | KIAA0406 | -6.6 |
| 259    | AMBP     | -6.6 |
| 7139   | TNNT2    | -6.6 |
| 5630   | PRPH     | -6.6 |
| 9971   | NR1H4    | -6.6 |
| 171019 | ADAMTS19 | -6.6 |
| 83850  | FAM62C   | -6.7 |
| 2706   | GJB2     | -6.7 |
| 81552  | ECOP     | -6.7 |
| 5959   | RDH5     | -6.7 |
| 13     | AADAC    | -6.7 |
| 339327 | ZNF546   | -6.7 |
| 115290 | FBXO17   | -6.7 |
| 1891   | ECH1     | -6.8 |
| 29     | ABR      | -6.8 |
| 5744   | PTHLH    | -6.8 |
| 29775  | CARD10   | -6.8 |
| 4829   | NMBR     | -6.8 |
| 24146  | CLDN15   | -6.8 |
| 6822   | SULT2A1  | -6.8 |
| 421    | ARVCF    | -6.8 |
| 8630   | HSD17B6  | -6.8 |
| 84310  | MGC11257 | -6.9 |
| 25864  | ABHD14A  | -6.9 |
| 8673   | VAMP8    | -6.9 |
| 9826   | ARHGEF11 | -6.9 |
| 635    | BHMT     | -6.9 |
| 4320   | MMP11    | -6.9 |
| 5555   | PRH2     | -6.9 |
| 8876   | VNN1     | -7   |
| 51171  | DHRS10   | -7   |
| 127845 | GOLT1A   | -7   |
| 54810  | GIPC2    | -7   |
| 4069   | LYZ      | -7   |
| 11136  | SLC7A9   | -7   |

|        |          |      |
|--------|----------|------|
| 56547  | MMP26    | -5.9 |
| 169270 | ZNF596   | -5.9 |
| 3630   | INS      | -5.9 |
| 64897  | C12orf43 | -5.9 |
| 3821   | KLRC1    | -5.9 |
| 160897 | ITR      | -5.9 |
| 85413  | SLC22A16 | -5.9 |
| 467    | ATF3     | -6   |
| 84648  | LCE3D    | -6   |
| 23601  | CLEC5A   | -6   |
| 5596   | MAPK4    | -6   |
| 345275 | HSD17B13 | -6   |
| 388289 | C16orf47 | -6   |
| 93643  | TJAP1    | -6   |
| 1138   | CHRNA5   | -6   |
| 79690  | GAL3ST4  | -6   |
| 43847  | KLK14    | -6   |
| 79825  | CCDC48   | -6   |
| 375061 | FAM89A   | -6   |
| 2220   | FCN2     | -6   |
| 140689 | CBLN4    | -6   |
| 1066   | CES1     | -6   |
| 3080   | CFHR2    | -6   |
| 51161  | C3orf18  | -6   |
| 270    | AMPD1    | -6   |
| 161497 | STRC     | -6   |
| 3903   | LAIR1    | -6   |
| 10255  | HCG9     | -6   |
| 53632  | PRKAG3   | -6   |
| 7419   | VDAC3    | -6   |
| 779    | CACNA1S  | -6   |
| 2999   | GZMH     | -6   |
| 57605  | PITPNM2  | -6   |
| 23209  | MLC1     | -6   |
| 399717 | FLJ45983 | -6   |
| 2679   | GGT2     | -6   |
| 417    | ART1     | -6.1 |
| 4351   | MPI      | -6.1 |
| 10750  | GRAP     | -6.1 |
| 54658  | UGT1A1   | -6.1 |
| 921    | CD5      | -6.1 |
| 57611  | ISLR2    | -6.1 |
| 9965   | FGF19    | -6.1 |
| 149345 | TMEM58   | -6.1 |

|        |           |      |
|--------|-----------|------|
| 8470   | SORBS2    | -5.2 |
| 57003  | CCDC47    | -5.2 |
| 79849  | PDZD3     | -5.2 |
| 8741   | TNFSF13   | -5.2 |
| 9049   | AIP       | -5.2 |
| 6242   | RTKN      | -5.2 |
| 55630  | SLC39A4   | -5.2 |
| 5510   | PPP1R7    | -5.2 |
| 5213   | PFKM      | -5.2 |
| 64777  | FLJ22318  | -5.2 |
| 55314  | FLJ11155  | -5.2 |
| 1133   | CHRM5     | -5.2 |
| 1212   | CLTB      | -5.2 |
| 93650  | ACPT      | -5.2 |
| 2013   | EMP2      | -5.2 |
| 64866  | CDCP1     | -5.2 |
| 56832  | IFNK      | -5.2 |
| 127833 | SYT2      | -5.2 |
| 375061 | FAM89A    | -5.2 |
| 64063  | PRSS22    | -5.3 |
| 5260   | PHKG1     | -5.3 |
| 11035  | RIPK3     | -5.3 |
| 3856   | KRT8      | -5.3 |
| 5325   | PLAGL1    | -5.3 |
| 1917   | EEF1A2    | -5.3 |
| 7881   | KCNAB1    | -5.3 |
| 2863   | GPR39     | -5.3 |
| 89790  | SIGLEC10  | -5.4 |
| 1305   | COL13A1   | -5.4 |
| 22921  | MSRB2     | -5.4 |
| 2872   | MKNK2     | -5.4 |
| 4879   | NPPB      | -5.4 |
| 347733 | TUBB2B    | -5.4 |
| 93611  | FBXO44    | -5.4 |
| 4258   | MGST2     | -5.4 |
| 152816 | FLJ23657  | -5.4 |
| 140    | ADORA3    | -5.4 |
| 64073  | C19orf33  | -5.4 |
| 7253   | TSHR      | -5.4 |
| 268    | AMH       | -5.4 |
| 6910   | TBX5      | -5.4 |
| 25823  | TPSG1     | -5.5 |
| 1672   | DEFB1     | -5.5 |
| 145264 | SERPINA12 | -5.5 |

|        |          |      |
|--------|----------|------|
| 83482  | SCRT1    | -7   |
| 149461 | CLDN19   | -7   |
| 5554   | PRH1     | -7   |
| 7104   | TM4SF4   | -7   |
| 92840  | REEP6    | -7   |
| 255352 | C10orf93 | -7   |
| 2063   | NR2F6    | -7   |
| 2646   | GCKR     | -7.1 |
| 8718   | TNFRSF25 | -7.1 |
| 79187  | FSD1     | -7.1 |
| 6242   | RTKN     | -7.1 |
| 79814  | AGMAT    | -7.1 |
| 29948  | OKL38    | -7.1 |
| 51268  | PIPOX    | -7.2 |
| 6770   | STAR     | -7.2 |
| 29881  | NPC1L1   | -7.2 |
| 4224   | MEP1A    | -7.2 |
| 148252 | DIRAS1   | -7.3 |
| 7490   | WT1      | -7.3 |
| 113675 | SDSL     | -7.3 |
| 2065   | ERBB3    | -7.3 |
| 283078 | IRXL1    | -7.3 |
| 5104   | SERPINA5 | -7.4 |
| 5720   | PSME1    | -7.4 |
| 55615  | PRR5     | -7.4 |
| 4804   | NGFR     | -7.4 |
| 116085 | SLC22A12 | -7.4 |
| 8424   | BBOX1    | -7.4 |
| 1368   | CPM      | -7.5 |
| 321    | APBA2    | -7.5 |
| 5648   | MASP1    | -7.5 |
| 3700   | ITIH4    | -7.5 |
| 284340 | UNQ473   | -7.5 |
| 6714   | SRC      | -7.5 |
| 3250   | HPR      | -7.6 |
| 5306   | PITPNA   | -7.6 |
| 166012 | CHST13   | -7.6 |
| 51435  | SCARA3   | -7.6 |
| 3931   | LCAT     | -7.6 |
| 57125  | PLXDC1   | -7.7 |
| 6554   | SLC10A1  | -7.7 |
| 3918   | LAMC2    | -7.7 |
| 389434 | C6orf71  | -7.7 |
| 79935  | FLJ13265 | -7.7 |
| 6506   | SLC1A2   | -7.7 |

|        |           |      |
|--------|-----------|------|
| 343    | AQP8      | -6.1 |
| 8048   | CSRP3     | -6.1 |
| 124404 | FLJ25410  | -6.1 |
| 79679  | VTCN1     | -6.1 |
| 1668   | DEFA3     | -6.1 |
| 114771 | PGLYRP3   | -6.1 |
| 2980   | GUCA2A    | -6.1 |
| 80740  | LY6G6C    | -6.1 |
| 283297 | OR10A4    | -6.1 |
| 144423 | GLT1D1    | -6.1 |
| 147409 | DSG4      | -6.1 |
| 23495  | TNFRSF13B | -6.1 |
| 4159   | MC3R      | -6.1 |
| 3036   | HAS1      | -6.1 |
| 84814  | PPAPDC3   | -6.1 |
| 5408   | PNLIPRP2  | -6.1 |
| 80117  | ARL14     | -6.1 |
| 337977 | KRTAP21-1 | -6.1 |
| 165186 | LOC165186 | -6.2 |
| 4313   | MMP2      | -6.2 |
| 284525 | SLC9A11   | -6.2 |
| 9783   | RIMS3     | -6.2 |
| 8789   | FBP2      | -6.2 |
| 1258   | CNGB1     | -6.2 |
| 338567 | KCNK18    | -6.2 |
| 29953  | TRHDE     | -6.2 |
| 820    | CAMP      | -6.2 |
| 84227  | RGSL2     | -6.2 |
| 126014 | OSCAR     | -6.2 |
| 1198   | CLK3      | -6.2 |
| 131377 | KBTBD5    | -6.2 |
| 3952   | LEP       | -6.2 |
| 4239   | MFAP4     | -6.2 |
| 7465   | WEE1      | -6.2 |
| 389012 | FLJ42986  | -6.3 |
| 5602   | MAPK10    | -6.3 |
| 283422 | C12orf36  | -6.3 |
| 7226   | TRPM2     | -6.3 |
| 53947  | A4GALT    | -6.3 |
| 8620   | NPFF      | -6.3 |
| 220070 | LOC220070 | -6.3 |
| 5032   | P2RY11    | -6.3 |
| 220004 | FLJ32771  | -6.3 |
| 8896   | G10       | -6.3 |
| 85360  | SYDE1     | -6.3 |

|        |           |      |
|--------|-----------|------|
| 66005  | CHID1     | -5.5 |
| 7293   | TNFRSF4   | -5.5 |
| 10551  | AGR2      | -5.5 |
| 623    | BDKRB1    | -5.5 |
| 6521   | SLC4A1    | -5.5 |
| 55529  | TMEM55A   | -5.5 |
| 3898   | LAD1      | -5.5 |
| 57817  | HAMP      | -5.5 |
| 170691 | ADAMTS17  | -5.5 |
| 26353  | HSPB8     | -5.5 |
| 22937  | SCAP      | -5.5 |
| 1999   | ELF3      | -5.5 |
| 55738  | ARFGAP1   | -5.5 |
| 29766  | TMOD3     | -5.6 |
| 51127  | TRIM17    | -5.6 |
| 124975 | GGT6      | -5.6 |
| 6123   | RPL3L     | -5.6 |
| 9788   | MTSS1     | -5.6 |
| 126868 | C1orf161  | -5.6 |
| 55702  | FLJ10374  | -5.6 |
| 11014  | KDEL2     | -5.6 |
| 397    | ARHGDI1   | -5.6 |
| 728    | C5AR1     | -5.6 |
| 5003   | SLC22A18A | -5.6 |
| 147495 | APCDD1    | -5.6 |
| 7517   | XRCC3     | -5.6 |
| 1525   | CXADR     | -5.6 |
| 26281  | FGF20     | -5.6 |
| 1387   | CREBBP    | -5.7 |
| 57165  | GJA12     | -5.7 |
| 10801  | 9-Sep     | -5.7 |
| 166    | AES       | -5.7 |
| 7022   | TFAP2C    | -5.7 |
| 2950   | GSTP1     | -5.7 |
| 1524   | CX3CR1    | -5.7 |
| 345275 | HSD17B13  | -5.7 |
| 51304  | ZDHHC3    | -5.7 |
| 50964  | SOST      | -5.7 |
| 7874   | USP7      | -5.7 |
| 64077  | LHPP      | -5.7 |
| 11100  | HNRPUL1   | -5.7 |
| 1952   | CELSR2    | -5.8 |
| 83715  | ESPN      | -5.8 |
| 254528 | MGC35212  | -5.8 |
| 8638   | OASL      | -5.8 |

|        |           |      |
|--------|-----------|------|
| 496    | ATP4B     | -7.7 |
| 5004   | ORM1      | -7.7 |
| 5174   | PDZK1     | -7.8 |
| 58985  | IL22RA1   | -7.8 |
| 4490   | MT1B      | -7.8 |
| 80004  | RBM35B    | -7.9 |
| 80168  | MOGAT2    | -7.9 |
| 122416 | ANKRD9    | -7.9 |
| 7052   | TGM2      | -7.9 |
| 10921  | RNPS1     | -8   |
| 1820   | ARID3A    | -8   |
| 1565   | CYP2D6    | -8   |
| 128602 | C20orf85  | -8   |
| 4773   | NFATC2    | -8.1 |
| 85006  | C21orf124 | -8.1 |
| 54979  | HRASLS2   | -8.1 |
| 325    | APCS      | -8.1 |
| 26230  | TIAM2     | -8.1 |
| 622    | BDH       | -8.1 |
| 10659  | CUGBP2    | -8.1 |
| 2242   | FES       | -8.2 |
| 114990 | SLITL2    | -8.2 |
| 11251  | GPR44     | -8.2 |
| 1749   | DLX5      | -8.2 |
| 283171 | C11orf44  | -8.2 |
| 433    | ASGR2     | -8.2 |
| 1244   | ABCC2     | -8.3 |
| 8528   | DDO       | -8.3 |
| 3856   | KRT8      | -8.4 |
| 57168  | ASPHD2    | -8.5 |
| 3176   | HNMT      | -8.6 |
| 201780 | SLC10A4   | -8.6 |
| 114770 | PGLYRP2   | -8.6 |
| 116496 | C1orf24   | -8.6 |
| 1179   | CLCA1     | -8.7 |
| 64902  | AGXT2     | -8.7 |
| 2155   | F7        | -8.7 |
| 338094 | C1orf179  | -8.7 |
| 3158   | HMGCS2    | -8.7 |
| 9032   | TM4SF5    | -8.8 |
| 1903   | EDG3      | -8.8 |
| 91373  | UAP1L1    | -8.8 |
| 114571 | SLC22A9   | -8.8 |

|        |                   |      |
|--------|-------------------|------|
| 495    | ATP4A             | -6.3 |
| 4846   | NOS3              | -6.3 |
| 4256   | MGP               | -6.3 |
| 2206   | MS4A2             | -6.3 |
| 91663  | MYADM             | -6.3 |
| 3451   | IFNA17            | -6.3 |
| 5118   | PCOLCE            | -6.3 |
| 1215   | CMA1              | -6.3 |
| 55273  | TMEM100           | -6.3 |
| 374739 | TEPP              | -6.3 |
| 84690  | SPATA22           | -6.3 |
| 9612   | NCOR2             | -6.4 |
| 164656 | TMPRSS6           | -6.4 |
| 25770  | HS747E2A          | -6.4 |
| 79906  | MORN1             | -6.4 |
| 4725   | NDUFS5            | -6.4 |
| 11318  | ADMR              | -6.4 |
| 389197 | FLJ46481          | -6.4 |
| 1669   | DEFA4             | -6.4 |
| 4656   | MYOG              | -6.4 |
| 242    | ALOX12B           | -6.4 |
| 81027  | TUBB1             | -6.4 |
| 885    | CCK               | -6.4 |
| 551    | AVP               | -6.4 |
| 5322   | PLA2G5            | -6.4 |
| 219928 | MRGPRF            | -6.4 |
| 22982  | DIP2C             | -6.4 |
| 971    | CD72              | -6.4 |
| 43849  | KLK12             | -6.4 |
| 920    | CD4               | -6.4 |
| 3479   | IGF1              | -6.4 |
| 5858   | PZP               | -6.4 |
| 930    | CD19              | -6.4 |
| 8838   | WISP3             | -6.4 |
| 23643  | LY96              | -6.4 |
| 4161   | MC5R              | -6.4 |
| 37     | ACADVL            | -6.5 |
| 54544  | C1orf42           | -6.5 |
| 3001   | GZMA              | -6.5 |
| 2213   | FCGR2B            | -6.5 |
| 9376   | SLC22A8           | -6.5 |
| 91156  | DKFZp434B<br>1231 | -6.5 |
| 57102  | C12orf4           | -6.5 |

|        |           |      |
|--------|-----------|------|
| 4051   | CYP4F3    | -5.8 |
| 2192   | FBLN1     | -5.8 |
| 10573  | MRPL28    | -5.8 |
| 345274 | SLC10A6   | -5.8 |
| 81553  | FAM49A    | -5.8 |
| 10103  | TSPAN1    | -5.8 |
| 4199   | ME1       | -5.8 |
| 6749   | SSRP1     | -5.8 |
| 148022 | TICAM1    | -5.8 |
| 50619  | DEF6      | -5.8 |
| 7991   | TUSC3     | -5.8 |
| 26290  | GALNT8    | -5.9 |
| 9123   | SLC16A3   | -5.9 |
| 2844   | GPR21     | -5.9 |
| 340061 | LOC340061 | -5.9 |
| 23166  | STAB1     | -5.9 |
| 11184  | MAP4K1    | -5.9 |
| 140689 | CBLN4     | -5.9 |
| 9476   | NAPSA     | -5.9 |
| 8514   | KCNAB2    | -5.9 |
| 79581  | GPR172A   | -5.9 |
| 6935   | TCF8      | -5.9 |
| 3695   | ITGB7     | -5.9 |
| 131408 | C3orf40   | -6   |
| 2916   | GRM6      | -6   |
| 254295 | PHYHD1    | -6   |
| 90990  | KIFC2     | -6   |
| 115572 | FAM46B    | -6.1 |
| 29079  | MED4      | -6.1 |
| 3984   | LIMK1     | -6.1 |
| 64101  | LRRC4     | -6.1 |
| 51214  | IGF2AS    | -6.1 |
| 118472 | ZNF511    | -6.1 |
| 114038 | C21orf84  | -6.1 |
| 2877   | GPX2      | -6.1 |
| 22924  | MAPRE3    | -6.2 |
| 10256  | CNKSR1    | -6.2 |
| 124857 | WFIKK2    | -6.2 |
| 8436   | SDPR      | -6.2 |
| 6005   | RHAG      | -6.2 |
| 9625   | AATK      | -6.2 |
| 54680  | C1orf181  | -6.2 |
| 4071   | TM4SF1    | -6.3 |

|        |           |      |
|--------|-----------|------|
| 5342   | PLGLB2    | -8.9 |
| 2741   | GLRA1     | -8.9 |
| 1018   | CDK3      | -9   |
| 8858   | PROZ      | -9   |
| 712    | C1QA      | -9   |
| 3263   | HPX       | -9.1 |
| 8416   | ANXA9     | -9.1 |
| 83729  | INHBE     | -9.1 |
| 55103  | RALGPS2   | -9.1 |
| 7066   | THPO      | -9.1 |
| 197    | AHSG      | -9.1 |
| 55937  | APOM      | -9.1 |
| 83547  | RILP      | -9.1 |
| 114038 | C21orf84  | -9.2 |
| 3340   | NDST1     | -9.2 |
| 150135 | C21orf129 | -9.2 |
| 54923  | LIME1     | -9.2 |
| 400830 | DEFB32    | -9.2 |
| 1733   | DIO1      | -9.2 |
| 64816  | CYP3A43   | -9.2 |
| 2812   | GP1BB     | -9.3 |
| 1369   | CPN1      | -9.3 |
| 55811  | SAC       | -9.3 |
| 3626   | INHBC     | -9.3 |
| 84275  | MGC4399   | -9.3 |
| 2052   | EPHX1     | -9.3 |
| 80201  | HKDC1     | -9.4 |
| 3199   | HOXA2     | -9.5 |
| 4762   | NEUROG1   | -9.5 |
| 717    | C2        | -9.5 |
| 133121 | ENPP6     | -9.5 |
| 374969 | CCDC23    | -9.6 |
| 79981  | FRMD1     | -9.8 |
| 8537   | BCAS1     | -9.8 |
| 152189 | CMTM8     | -9.8 |
| 85004  | RERG      | -9.9 |
| 8692   | HYAL2     | -10  |
| 83541  | C20orf55  | -10  |
| 51042  | ZNF593    | -10  |
| 5267   | SERPINA4  | -10  |
| 130    | ADH6      | -10  |
| 51733  | UPB1      | -10  |
| 2527   | FUT5      | -10  |
| 317749 | DHRS4L2   | -10  |

|        |          |      |
|--------|----------|------|
| 10326  | SIRPB1   | -6.5 |
| 8747   | ADAM21   | -6.5 |
| 353144 | LCE3C    | -6.5 |
| 7043   | TGFB3    | -6.5 |
| 1417   | CRYBB3   | -6.5 |
| 84203  | TXNDC2   | -6.5 |
| 2022   | ENG      | -6.5 |
| 158062 | LCN6     | -6.5 |
| 63968  | PWCR1    | -6.5 |
| 255027 | FLJ39599 | -6.5 |
| 2949   | GSTM5    | -6.6 |
| 10050  | SLC17A4  | -6.6 |
| 50615  | IL21R    | -6.6 |
| 7267   | TTC3     | -6.6 |
| 1667   | DEFA1    | -6.6 |
| 113730 | KLHDC7B  | -6.6 |
| 10382  | TUBB4    | -6.6 |
| 84514  | LGP1     | -6.6 |
| 54965  | PIGX     | -6.6 |
| 909    | CD1A     | -6.6 |
| 219793 | C10orf27 | -6.6 |
| 23533  | PIK3R5   | -6.6 |
| 5184   | PEPD     | -6.6 |
| 83874  | TBC1D10A | -6.6 |
| 9033   | PKD2L1   | -6.6 |
| 112476 | PRRT2    | -6.6 |
| 23371  | TENC1    | -6.6 |
| 26279  | PLA2G2D  | -6.7 |
| 6280   | S100A9   | -6.7 |
| 1811   | SLC26A3  | -6.7 |
| 6009   | RHEB     | -6.7 |
| 23761  | PISD     | -6.7 |
| 10536  | LEPREL2  | -6.7 |
| 10136  | ELA3A    | -6.7 |
| 286077 | FLJ46072 | -6.7 |
| 117532 | TMC2     | -6.7 |
| 1908   | EDN3     | -6.7 |
| 90011  | FLJ00060 | -6.7 |
| 83959  | SLC4A11  | -6.7 |
| 85453  | TSPYL5   | -6.7 |
| 128821 | CST9L    | -6.7 |
| 79005  | SCNM1    | -6.7 |
| 83693  | HSDL1    | -6.7 |
| 26291  | FGF21    | -6.8 |

|        |           |      |
|--------|-----------|------|
| 8844   | KSR1      | -6.3 |
| 9743   | RICS      | -6.3 |
| 2701   | GJA4      | -6.3 |
| 632    | BGLAP     | -6.3 |
| 3384   | ICAM2     | -6.3 |
| 192666 | KRT24     | -6.3 |
| 6279   | S100A8    | -6.3 |
| 55567  | DNAH3     | -6.4 |
| 400830 | DEFB32    | -6.4 |
| 54210  | TREM1     | -6.4 |
| 164091 | PAQR7     | -6.4 |
| 83742  | MARVELD1  | -6.4 |
| 5148   | PDE6G     | -6.4 |
| 147700 | KLC3      | -6.4 |
| 28951  | TRIB2     | -6.4 |
| 151011 | 10-Sep    | -6.5 |
| 161725 | OTUD7     | -6.5 |
| 284739 | LOC284739 | -6.5 |
| 3159   | HMGA1     | -6.5 |
| 199699 | DAND5     | -6.5 |
| 57152  | SLURP1    | -6.5 |
| 10501  | SEMA6B    | -6.5 |
| 23263  | MCF2L     | -6.5 |
| 150244 | FLJ31568  | -6.5 |
| 79228  | WDR58     | -6.5 |
| 3779   | KCNMB1    | -6.5 |
| 29941  | PKN3      | -6.6 |
| 513    | ATP5D     | -6.6 |
| 686    | BTD       | -6.6 |
| 9056   | SLC7A7    | -6.6 |
| 4147   | MATN2     | -6.7 |
| 6355   | CCL8      | -6.7 |
| 79885  | HDAC11    | -6.7 |
| 58985  | IL22RA1   | -6.7 |
| 23620  | NTSR2     | -6.7 |
| 55612  | C20orf42  | -6.7 |
| 10089  | KCNK7     | -6.8 |
| 83650  | AMAC1L2   | -6.8 |
| 116285 | ACSM1     | -6.8 |
| 23413  | FREQ      | -6.8 |
| 390212 | GPR152    | -6.8 |
| 83541  | C20orf55  | -6.8 |
| 780    | DDR1      | -6.8 |
| 54777  | C10orf92  | -6.8 |

|        |           |     |
|--------|-----------|-----|
| 23231  | KIAA0746  | -10 |
| 1582   | CYP8B1    | -10 |
| 388007 | SERPINA13 | -10 |
| 5444   | PON1      | -10 |
| 10637  | LEFTY1    | -10 |
| 6097   | RORC      | -10 |
| 5265   | SERPINA1  | -10 |
| 3960   | LGALS4    | -10 |
| 116844 | LRG1      | -10 |
| 57402  | S100A14   | -10 |
| 2328   | FMO3      | -10 |
| 57104  | PNPLA2    | -10 |
| 5867   | RAB4A     | -10 |
| 462    | SERPINC1  | -10 |
| 84258  | SYT3      | -10 |
| 6339   | SCNN1D    | -10 |
| 51296  | SLC15A3   | -10 |
| 5308   | PITX2     | -11 |
| 4803   | NGFB      | -11 |
| 1579   | CYP4A11   | -11 |
| 6717   | SRI       | -11 |
| 5364   | PLXNB1    | -11 |
| 9208   | LRRFIP1   | -11 |
| 5105   | PCK1      | -11 |
| 57167  | SALL4     | -11 |
| 9963   | SLC23A1   | -11 |
| 2822   | GPLD1     | -11 |
| 3034   | HAL       | -11 |
| 55651  | NOLA2     | -11 |
| 725    | C4BPB     | -11 |
| 432    | ASGR1     | -11 |
| 113220 | KIF12     | -11 |
| 65012  | SLC26A10  | -11 |
| 83758  | RBP5      | -11 |
| 5176   | SERPINF1  | -12 |
| 843    | CASP10    | -12 |
| 4153   | MBL2      | -12 |
| 1564   | CYP2D7P1  | -12 |
| 3026   | HABP2     | -12 |
| 3240   | HP        | -12 |
| 221    | ALDH3B1   | -12 |
| 629    | CFB       | -12 |
| 336    | APOA2     | -12 |
| 57533  | TBC1D14   | -12 |

|        |           |      |
|--------|-----------|------|
| 973    | CD79A     | -6.8 |
| 2880   | GPX5      | -6.8 |
| 282617 | IL28B     | -6.8 |
| 60385  | TSKS      | -6.8 |
| 8435   | SOAT2     | -6.8 |
| 153201 | SLC36A2   | -6.8 |
| 112755 | STX1B2    | -6.8 |
| 2882   | GPX7      | -6.8 |
| 2515   | ADAM2     | -6.8 |
| 93190  | C1orf158  | -6.8 |
| 6947   | TCN1      | -6.8 |
| 10753  | CAPN9     | -6.8 |
| 5008   | OSM       | -6.8 |
| 115861 | TXNL6     | -6.8 |
| 92747  | C20orf114 | -6.8 |
| 22902  | RUFY3     | -6.8 |
| 54900  | LAX1      | -6.8 |
| 2208   | FCER2     | -6.8 |
| 201305 | MGC29671  | -6.9 |
| 26998  | FETUB     | -6.9 |
| 378708 | APITD1    | -6.9 |
| 1159   | CKMT1B    | -6.9 |
| 8021   | NUP214    | -6.9 |
| 7730   | ZNF177    | -6.9 |
| 1208   | CLPS      | -6.9 |
| 27178  | IL1F7     | -6.9 |
| 79054  | TRPM8     | -6.9 |
| 10666  | CD226     | -6.9 |
| 10964  | IFI44L    | -6.9 |
| 125206 | SLC5A10   | -6.9 |
| 200909 | HTR3D     | -6.9 |
| 7133   | TNFRSF1B  | -6.9 |
| 147741 | ZNF560    | -6.9 |
| 59351  | PBOV1     | -6.9 |
| 3577   | IL8RA     | -6.9 |
| 4337   | MOCS1     | -6.9 |
| 5553   | PRG2      | -6.9 |
| 11170  | FAM107A   | -6.9 |
| 29949  | IL19      | -6.9 |
| 57010  | CABP4     | -6.9 |
| 1325   | CORT      | -7   |
| 23615  | PYY2      | -7   |
| 124989 | C17orf57  | -7   |
| 400359 | FLJ35695  | -7   |

|        |           |      |
|--------|-----------|------|
| 6614   | SN        | -6.8 |
| 1577   | CYP3A5    | -6.8 |
| 6387   | CXCL12    | -6.8 |
| 56971  | CEACAM19  | -6.8 |
| 85378  | TUBGCP6   | -6.9 |
| 5777   | PTPN6     | -6.9 |
| 83871  | RAB34     | -6.9 |
| 146802 | FLJ31196  | -6.9 |
| 84821  | MGC13168  | -6.9 |
| 8808   | IL1RL2    | -6.9 |
| 2853   | GPR31     | -6.9 |
| 2041   | EPHA1     | -7   |
| 1847   | DUSP5     | -7   |
| 51759  | C9orf78   | -7   |
| 8764   | TNFRSF14  | -7   |
| 11025  | LILRB3    | -7   |
| 4081   | MAB21L1   | -7   |
| 286257 | C9orf142  | -7   |
| 2581   | GALC      | -7   |
| 27071  | DAPP1     | -7.1 |
| 4487   | MSX1      | -7.1 |
| 81889  | FAHD1     | -7.1 |
| 80004  | RBM35B    | -7.1 |
| 116123 | LOC116123 | -7.1 |
| 9796   | PHYHIP    | -7.1 |
| 132014 | IL17RE    | -7.2 |
| 29108  | PYCARD    | -7.2 |
| 122622 | ADSSL1    | -7.2 |
| 5275   | SERPINB13 | -7.2 |
| 1307   | COL16A1   | -7.2 |
| 360132 | FKBP9L    | -7.2 |
| 9324   | HMG3      | -7.2 |
| 50509  | COL5A3    | -7.2 |
| 7051   | TGM1      | -7.2 |
| 85395  | C21orf70  | -7.3 |
| 57678  | GPAM      | -7.3 |
| 55620  | STAP2     | -7.3 |
| 6540   | SLC6A13   | -7.3 |
| 164284 | FLJ90166  | -7.3 |
| 26012  | NELF      | -7.3 |
| 283860 | FLJ36701  | -7.3 |
| 89941  | RHOT2     | -7.3 |
| 9073   | CLDN8     | -7.3 |
| 3881   | KRTHA1    | -7.3 |



|        |          |     |
|--------|----------|-----|
| 3697   | ITIH1    | -12 |
| 9235   | IL32     | -13 |
| 94086  | HSPB9    | -13 |
| 51208  | CLDN18   | -13 |
| 866    | SERPINA6 | -13 |
| 6360   | CCL16    | -13 |
| 344    | APOC2    | -13 |
| 9154   | SLC28A1  | -13 |
| 108    | ADCY2    | -13 |
| 3990   | LIPC     | -13 |
| 9970   | NR1I3    | -13 |
| 144193 | AMDHD1   | -13 |
| 5005   | ORM2     | -13 |
| 55908  | LOC55908 | -13 |
| 3233   | HOXD4    | -13 |
| 266629 | SEC14L3  | -13 |
| 1757   | SARDH    | -13 |
| 60529  | ALX4     | -13 |
| 23589  | CARHSP1  | -13 |
| 3929   | LBP      | -13 |
| 3294   | HSD17B2  | -13 |
| 255043 | TMEM86B  | -14 |
| 8309   | ACOX2    | -14 |
| 290    | ANPEP    | -14 |
| 80341  | BPIL1    | -14 |
| 3053   | SERPIND1 | -14 |
| 55867  | SLC22A11 | -14 |
| 112817 | C10orf65 | -14 |
| 3483   | IGFALS   | -14 |
| 3242   | HPD      | -14 |
| 183    | AGT      | -14 |
| 23562  | CLDN14   | -15 |
| 115584 | SLC5A11  | -15 |
| 2886   | GRB7     | -15 |
| 3172   | HNF4A    | -15 |
| 5348   | FXYD1    | -15 |
| 26007  | DAK      | -15 |
| 148738 | HFE2     | -15 |
| 79170  | ATAD4    | -15 |
| 51066  | C3orf32  | -15 |
| 25791  | NGEF     | -16 |
| 5624   | PROC     | -16 |
| 189    | AGXT     | -16 |
| 5524   | PPP2R4   | -16 |

|        |           |      |
|--------|-----------|------|
| 8483   | CILP      | -7   |
| 80342  | TRAF3IP3  | -7   |
| 140446 | KRT6C     | -7   |
| 7429   | VIL1      | -7   |
| 401508 | FLJ45202  | -7   |
| 338339 | CLEC4D    | -7   |
| 132112 | RTP1      | -7   |
| 27237  | ARHGEF16  | -7   |
| 761    | CA3       | -7   |
| 64579  | NDST4     | -7   |
| 134    | ADORA1    | -7   |
| 4640   | MYO1A     | -7   |
| 6480   | ST6GAL1   | -7.1 |
| 10517  | FBXW10    | -7.1 |
| 83698  | CALN1     | -7.1 |
| 348932 | SLC6A18   | -7.1 |
| 10320  | ZNFN1A1   | -7.1 |
| 1473   | CST5      | -7.1 |
| 83871  | RAB34     | -7.1 |
| 6677   | SPAM1     | -7.1 |
| 942    | CD86      | -7.1 |
| 5831   | PYCR1     | -7.1 |
| 5539   | PPY       | -7.1 |
| 92591  | ASB16     | -7.1 |
| 5741   | PTH       | -7.1 |
| 126410 | FLJ39501  | -7.1 |
| 283487 | LOC283487 | -7.1 |
| 4342   | MOS       | -7.1 |
| 79183  | C20orf121 | -7.1 |
| 6368   | CCL23     | -7.1 |
| 324    | APC       | -7.1 |
| 27290  | SPINK4    | -7.1 |
| 3717   | JAK2      | -7.2 |
| 389558 | UNQ1940   | -7.2 |
| 8749   | ADAM18    | -7.2 |
| 51378  | ANGPT4    | -7.2 |
| 84767  | TRIM51    | -7.2 |
| 127534 | GJB4      | -7.2 |
| 29800  | ZDHHC1    | -7.2 |
| 57459  | GATAD2B   | -7.2 |
| 79883  | FLJ23447  | -7.2 |
| 337960 | KRTAP13-3 | -7.2 |
| 2134   | EXTL1     | -7.2 |
| 347688 | TUBB8     | -7.2 |

|        |          |      |
|--------|----------|------|
| 284252 | KCTD1    | -7.4 |
| 23418  | CRB1     | -7.4 |
| 84708  | LNX1     | -7.4 |
| 5443   | POMC     | -7.4 |
| 64220  | STRA6    | -7.4 |
| 1437   | CSF2     | -7.5 |
| 8915   | BCL10    | -7.5 |
| 3163   | HMOX2    | -7.5 |
| 6398   | SECTM1   | -7.5 |
| 26298  | EHF      | -7.5 |
| 53822  | FXYD7    | -7.6 |
| 8424   | BBOX1    | -7.6 |
| 10672  | GNA13    | -7.6 |
| 126353 | C19orf21 | -7.6 |
| 11187  | PKP3     | -7.6 |
| 4814   | NINJ1    | -7.6 |
| 202915 | MGC9712  | -7.7 |
| 10045  | SH2D3A   | -7.7 |
| 6692   | SPINT1   | -7.7 |
| 5652   | PRSS8    | -7.7 |
| 2314   | FLII     | -7.7 |
| 246176 | GAS2L2   | -7.7 |
| 6549   | SLC9A2   | -7.7 |
| 56925  | LXN      | -7.7 |
| 2875   | GPT      | -7.8 |
| 84141  | FLJ13391 | -7.8 |
| 9144   | SYNGR2   | -7.8 |
| 53832  | IL20RA   | -7.8 |
| 149428 | BNIP1    | -7.8 |
| 83549  | UCK1     | -7.8 |
| 222389 | C10orf30 | -7.8 |
| 3854   | KRT6B    | -7.8 |
| 353174 | LGICZ1   | -7.8 |
| 1308   | COL17A1  | -7.8 |
| 23429  | RYBP     | -7.9 |
| 1145   | CHRNE    | -7.9 |
| 26504  | CNNM4    | -7.9 |
| 3140   | MR1      | -7.9 |
| 257000 | PLAC2    | -7.9 |
| 7481   | WNT11    | -7.9 |
| 56654  | NPDC1    | -8   |
| 401459 | FLJ46365 | -8   |
| 79098  | C1orf116 | -8   |
| 1364   | CLDN4    | -8   |

|        |           |     |
|--------|-----------|-----|
| 2161   | F12       | -16 |
| 344838 | PAQR9     | -16 |
| 51156  | SERPINA10 | -16 |
| 5970   | RELA      | -16 |
| 7448   | VTN       | -16 |
| 63924  | CIDEC     | -17 |
| 6927   | TCF1      | -17 |
| 64240  | ABCG5     | -17 |
| 7036   | TFR2      | -17 |
| 5083   | PAX9      | -17 |
| 9020   | MAP3K14   | -17 |
| 335    | APOA1     | -17 |
| 283375 | SLC39A5   | -17 |
| 718    | C3        | -17 |
| 763    | CA5A      | -18 |
| 4485   | MST1      | -18 |
| 283600 | C14orf68  | -18 |
| 222487 | GPR97     | -18 |
| 84647  | PLA2G12B  | -19 |
| 146456 | TMED6     | -19 |
| 90050  | C14orf152 | -19 |
| 5345   | SERPINF2  | -20 |
| 2147   | F2        | -20 |
| 10110  | SGK2      | -21 |
| 83597  | RTP3      | -21 |
| 10864  | SLC22A7   | -21 |
| 284723 | SLC25A34  | -21 |
| 131669 | UROC1     | -22 |
| 345    | APOC3     | -22 |
| 79574  | EPS8L3    | -22 |
| 8431   | NROB2     | -23 |
| 3699   | ITIH3     | -23 |
| 10747  | MASP2     | -24 |
| 1      | A1BG      | -28 |
| 3083   | HGFAC     | -30 |
| 2875   | GPT       | -31 |

|        |                     |      |
|--------|---------------------|------|
| 3270   | HRC                 | -7.2 |
| 3164   | NR4A1               | -7.2 |
| 80039  | FAM106A             | -7.2 |
| 6703   | SPRR2D              | -7.2 |
| 3910   | LAMA4               | -7.2 |
| 3002   | GZMB                | -7.3 |
| 4160   | MC4R                | -7.3 |
| 10462  | CLEC10A             | -7.3 |
| 944    | TNFSF8              | -7.3 |
| 114131 | UCN3                | -7.3 |
| 389114 | ZNF662              | -7.3 |
| 1160   | CKMT2               | -7.3 |
| 128488 | WFDC12              | -7.3 |
| 54     | ACP5                | -7.3 |
| 407977 | TNFSF12-<br>TNFSF13 | -7.3 |
| 486    | FXD2                | -7.3 |
| 123970 | MGC33367            | -7.3 |
| 79932  | KIAA0319L           | -7.3 |
| 55231  | FLJ10786            | -7.3 |
| 1280   | COL2A1              | -7.3 |
| 10279  | PRSS16              | -7.4 |
| 4696   | NDUFA3              | -7.4 |
| 10234  | LRRC17              | -7.4 |
| 8685   | MARCO               | -7.4 |
| 6698   | SPRR1A              | -7.4 |
| 54751  | FBLIM1              | -7.4 |
| 254173 | TTLL10              | -7.4 |
| 55586  | MIOX                | -7.4 |
| 221421 | C6orf206            | -7.4 |
| 51050  | PI15                | -7.4 |
| 3991   | LIPE                | -7.4 |
| 389123 | IQCF2               | -7.4 |
| 79713  | U2AF1L4             | -7.4 |
| 54838  | C10orf26            | -7.4 |
| 89910  | UBE3B               | -7.5 |
| 284451 | C19orf19            | -7.5 |
| 84292  | MORG1               | -7.5 |
| 1644   | DDC                 | -7.5 |
| 25803  | SPDEF               | -7.5 |
| 137835 | TMEM71              | -7.5 |
| 4154   | MBNL1               | -7.5 |
| 6397   | SEC14L1             | -7.5 |

|        |                |      |
|--------|----------------|------|
| 4055   | LTBR           | -8   |
| 79626  | TNFAIP8L2      | -8   |
| 116092 | DNTTIP1        | -8   |
| 5265   | SERPINA1       | -8.1 |
| 64132  | XYLT2          | -8.1 |
| 57121  | GPR92          | -8.1 |
| 285097 | FLJ38379       | -8.1 |
| 2651   | GCNT2          | -8.2 |
| 10410  | IFITM3         | -8.2 |
| 54436  | SH3TC1         | -8.2 |
| 50636  | TMEM16G        | -8.2 |
| 5881   | RAC3           | -8.2 |
| 9547   | CXCL14         | -8.2 |
| 4261   | CIITA          | -8.2 |
| 9048   | ARTN           | -8.3 |
| 55808  | ST6GALNAC<br>1 | -8.3 |
| 6363   | CCL19          | -8.3 |
| 7851   | MALL           | -8.3 |
| 55691  | FRMD4A         | -8.3 |
| 54546  | RNF186         | -8.3 |
| 27350  | APOBEC3C       | -8.3 |
| 115761 | ARL11          | -8.3 |
| 2593   | GAMT           | -8.3 |
| 55     | ACPP           | -8.3 |
| 10636  | RGS14          | -8.4 |
| 9537   | TP53I11        | -8.4 |
| 255027 | FLJ39599       | -8.4 |
| 8218   | CLTCL1         | -8.4 |
| 4720   | NDUFS2         | -8.4 |
| 166929 | MGC26963       | -8.4 |
| 2155   | F7             | -8.4 |
| 84688  | C9orf24        | -8.5 |
| 5738   | PTGFRN         | -8.5 |
| 29933  | GPR132         | -8.5 |
| 57149  | LOC57149       | -8.5 |
| 51110  | LACTB2         | -8.5 |
| 2765   | GML            | -8.5 |
| 9982   | FGFBP1         | -8.6 |
| 83886  | PRSS27         | -8.6 |
| 113828 | FAM83F         | -8.6 |
| 27141  | CIDEB          | -8.7 |
| 2525   | FUT3           | -8.7 |

|        |           |      |
|--------|-----------|------|
| 3460   | IFNGR2    | -7.5 |
| 116337 | PANX3     | -7.5 |
| 8602   | C4orf9    | -7.5 |
| 147746 | HIPK4     | -7.5 |
| 9962   | SLC23A2   | -7.5 |
| 26103  | LRRC21    | -7.6 |
| 4049   | LTA       | -7.6 |
| 92305  | TMEM129   | -7.6 |
| 338321 | NALP9     | -7.6 |
| 56257  | BCDIN3    | -7.6 |
| 90678  | LRSAM1    | -7.6 |
| 11185  | INMT      | -7.6 |
| 337880 | KRTAP11-1 | -7.6 |
| 5745   | PTHR1     | -7.6 |
| 414062 | CCL3L3    | -7.6 |
| 9027   | NAT8      | -7.6 |
| 9145   | SYNGR1    | -7.6 |
| 2516   | NR5A1     | -7.6 |
| 150248 | C22orf15  | -7.6 |
| 27033  | ZBTB32    | -7.6 |
| 400696 | LOC400696 | -7.6 |
| 9098   | USP6      | -7.7 |
| 5802   | PTPRS     | -7.7 |
| 2151   | F2RL2     | -7.7 |
| 64403  | CDH24     | -7.7 |
| 283298 | OLFML1    | -7.7 |
| 1553   | CYP2A13   | -7.7 |
| 59     | ACTA2     | -7.7 |
| 3097   | HIVEP2    | -7.7 |
| 54536  | EXOC6     | -7.7 |
| 115908 | CTHRC1    | -7.7 |
| 64231  | MS4A6A    | -7.7 |
| 60681  | FKBP10    | -7.7 |
| 3689   | ITGB2     | -7.8 |
| 84676  | TRIM63    | -7.8 |
| 1101   | CHAD      | -7.8 |
| 136371 | ASB10     | -7.8 |
| 2260   | FGFR1     | -7.8 |
| 6403   | SELP      | -7.8 |
| 7809   | BSND      | -7.8 |
| 50486  | GOS2      | -7.8 |
| 389084 | UNQ830    | -7.8 |
| 11093  | ADAMTS13  | -7.8 |

|        |          |      |
|--------|----------|------|
| 3429   | IFI27    | -8.7 |
| 22906  | TRAK1    | -8.7 |
| 2274   | FHL2     | -8.7 |
| 56169  | MLZE     | -8.8 |
| 93100  | NAPRT1   | -8.8 |
| 25953  | PNKD     | -8.8 |
| 143662 | MUC15    | -8.8 |
| 54742  | LY6K     | -8.9 |
| 169611 | OLFML2A  | -8.9 |
| 6865   | TACR2    | -8.9 |
| 3579   | IL8RB    | -8.9 |
| 140700 | SAMD10   | -8.9 |
| 50626  | CYHR1    | -8.9 |
| 116211 | TM4SF19  | -9   |
| 148930 | FLJ32011 | -9.1 |
| 25818  | KLK5     | -9.1 |
| 5306   | PITPNA   | -9.1 |
| 57449  | PLEKHG5  | -9.1 |
| 149483 | CCDC17   | -9.2 |
| 57124  | CD248    | -9.2 |
| 84225  | ZMYND15  | -9.2 |
| 1454   | CSNK1E   | -9.2 |
| 93643  | TJAP1    | -9.3 |
| 3918   | LAMC2    | -9.3 |
| 5268   | SERPINB5 | -9.3 |
| 124565 | MGC15523 | -9.3 |
| 55615  | PRR5     | -9.3 |
| 128272 | ARHGEF19 | -9.3 |
| 100    | ADA      | -9.5 |
| 203100 | HTRA4    | -9.5 |
| 4056   | LTC4S    | -9.5 |
| 8973   | CHRNA6   | -9.5 |
| 1991   | ELA2     | -9.5 |
| 8000   | PSCA     | -9.6 |
| 128308 | MRPL55   | -9.6 |
| 64129  | TINAGL1  | -9.7 |
| 151473 | SLC16A14 | -9.7 |
| 5524   | PPP2R4   | -9.8 |
| 858    | CAV2     | -9.8 |
| 5133   | PDCD1    | -9.8 |
| 3772   | KCNJ15   | -9.8 |
| 9121   | SLC16A5  | -9.8 |
| 11082  | ESM1     | -9.8 |

|        |          |      |
|--------|----------|------|
| 81472  | OR2C3    | -7.8 |
| 4332   | MNDA     | -7.8 |
| 10537  | UBD      | -7.8 |
| 23704  | KCNE4    | -7.8 |
| 57876  | MUC3B    | -7.8 |
| 283897 | C16orf54 | -7.8 |
| 51744  | CD244    | -7.9 |
| 115362 | GBP5     | -7.9 |
| 152065 | C3orf22  | -7.9 |
| 1513   | CTSK     | -7.9 |
| 6707   | SPRR3    | -7.9 |
| 286256 | LCN12    | -7.9 |
| 3846   | KRTAP5-9 | -7.9 |
| 339883 | C3orf35  | -7.9 |
| 6439   | SFTPB    | -7.9 |
| 566    | AZU1     | -7.9 |
| 4855   | NOTCH4   | -7.9 |
| 126259 | MGC23244 | -7.9 |
| 9891   | NUAK1    | -7.9 |
| 10578  | GNLY     | -7.9 |
| 5644   | PRSS1    | -8   |
| 6847   | SYCP1    | -8   |
| 112802 | KRT6IRS  | -8   |
| 4653   | MYOC     | -8   |
| 10661  | KLF1     | -8   |
| 6573   | SLC19A1  | -8   |
| 8436   | SDPR     | -8   |
| 114902 | C1QTNF5  | -8   |
| 6036   | RNASE2   | -8   |
| 5068   | REG3A    | -8   |
| 55888  | ZNF167   | -8.1 |
| 4295   | MLN      | -8.1 |
| 338398 | TAS2R60  | -8.1 |
| 26476  | OR10J1   | -8.1 |
| 1297   | COL9A1   | -8.1 |
| 80834  | TAS1R2   | -8.1 |
| 51314  | TXNDC3   | -8.1 |
| 79843  | FLJ22746 | -8.1 |
| 64405  | CDH22    | -8.1 |
| 929    | CD14     | -8.1 |
| 3543   | IGLL1    | -8.1 |
| 53828  | FXVD4    | -8.1 |
| 7380   | UPK3A    | -8.2 |
| 353134 | LCE1D    | -8.2 |

|        |           |      |
|--------|-----------|------|
| 768    | CA9       | -9.9 |
| 1116   | CHI3L1    | -9.9 |
| 7075   | TIE1      | -10  |
| 10755  | GIPC1     | -10  |
| 8906   | AP1G2     | -10  |
| 284114 | TMEM102   | -10  |
| 83716  | CRISPLD2  | -10  |
| 5623   | PSPN      | -10  |
| 339789 | LOC339789 | -10  |
| 27019  | DNAI1     | -10  |
| 5349   | FXVD3     | -10  |
| 200634 | KRTCAP3   | -10  |
| 1365   | CLDN3     | -10  |
| 201799 | FLJ32028  | -10  |
| 64288  | ZNF323    | -10  |
| 169166 | MGC39715  | -10  |
| 84948  | TIGD5     | -11  |
| 4237   | MFAP2     | -11  |
| 9749   | PHACTR2   | -11  |
| 10614  | HEXIM1    | -11  |
| 6834   | SURF1     | -11  |
| 834    | CASP1     | -11  |
| 4246   | SCGB2A1   | -11  |
| 128876 | C20orf128 | -11  |
| 4926   | NUMA1     | -11  |
| 150135 | C21orf129 | -11  |
| 2057   | EPOR      | -11  |
| 1638   | DCT       | -11  |
| 1018   | CDK3      | -11  |
| 9507   | ADAMTS4   | -11  |
| 201252 | FLJ23754  | -11  |
| 56834  | GPR137    | -11  |
| 51043  | ZBTB7B    | -11  |
| 5957   | RCV1      | -11  |
| 10039  | PARP3     | -11  |
| 23367  | LARP1     | -11  |
| 244    | ANXA8     | -11  |
| 164153 | UBL4B     | -11  |
| 4250   | SCGB2A2   | -11  |
| 51475  | CABP2     | -11  |
| 2099   | ESR1      | -11  |
| 9022   | CLIC3     | -11  |
| 2678   | GGT1      | -11  |
| 8843   | GPR109B   | -11  |

|        |           |      |
|--------|-----------|------|
| 255022 | FAM26C    | -8.2 |
| 5521   | PPP2R2B   | -8.2 |
| 84618  | NT5C1A    | -8.2 |
| 1621   | DBH       | -8.2 |
| 285780 | FLJ33708  | -8.2 |
| 84283  | TMEM79    | -8.2 |
| 1261   | CNGA3     | -8.2 |
| 23476  | BRD4      | -8.2 |
| 487    | ATP2A1    | -8.2 |
| 149699 | FAM112A   | -8.2 |
| 1791   | DNTT      | -8.2 |
| 9546   | APBA3     | -8.2 |
| 84225  | ZMYND15   | -8.3 |
| 3681   | ITGAD     | -8.3 |
| 140876 | C20orf175 | -8.3 |
| 10962  | MLLT11    | -8.3 |
| 7169   | TPM2      | -8.3 |
| 9961   | MVP       | -8.3 |
| 8930   | MBD4      | -8.3 |
| 1742   | DLG4      | -8.3 |
| 10044  | SH2D3C    | -8.3 |
| 5320   | PLA2G2A   | -8.3 |
| 23547  | LILRA4    | -8.3 |
| 147949 | ZNF583    | -8.3 |
| 2205   | FCER1A    | -8.3 |
| 64174  | DPEP2     | -8.4 |
| 3050   | HBZ       | -8.4 |
| 53919  | SLCO1C1   | -8.4 |
| 2178   | FANCE     | -8.4 |
| 2864   | FFAR1     | -8.4 |
| 2687   | GGTLA1    | -8.4 |
| 5552   | PRG1      | -8.4 |
| 79748  | LMAN1L    | -8.5 |
| 2251   | FGF6      | -8.5 |
| 1003   | CDH5      | -8.5 |
| 6014   | RIT2      | -8.5 |
| 286887 | KRT6E     | -8.5 |
| 8200   | GDF5      | -8.5 |
| 10407  | SPAG11    | -8.5 |
| 517    | ATP5G2    | -8.5 |
| 55658  | RNF126    | -8.6 |
| 8993   | PGLYRP1   | -8.6 |
| 6274   | S100A3    | -8.6 |
| 4689   | NCF4      | -8.6 |

|        |           |     |
|--------|-----------|-----|
| 125981 | ASAH3     | -11 |
| 6755   | SSTR5     | -12 |
| 84033  | OBSCN     | -12 |
| 11322  | TMC6      | -12 |
| 27134  | TJP3      | -12 |
| 4688   | NCF2      | -12 |
| 1056   | CEL       | -12 |
| 57111  | RAB25     | -12 |
| 114898 | C1QTNF2   | -12 |
| 1003   | CDH5      | -12 |
| 84286  | MGC4618   | -12 |
| 56300  | IL1F9     | -12 |
| 57402  | S100A14   | -12 |
| 221091 | LOC221091 | -12 |
| 349236 | LOC349236 | -12 |
| 10850  | CCL27     | -12 |
| 1776   | DNASE1L3  | -12 |
| 1823   | DSC1      | -12 |
| 3872   | KRT17     | -12 |
| 259    | AMBP      | -12 |
| 29984  | RHOD      | -12 |
| 404217 | CTXN1     | -12 |
| 1041   | CDSN      | -12 |
| 3557   | IL1RN     | -12 |
| 80097  | FLJ14346  | -12 |
| 4784   | NFIX      | -13 |
| 124152 | MGC35048  | -13 |
| 8839   | WISP2     | -13 |
| 79188  | TMEM43    | -13 |
| 9973   | CCS       | -13 |
| 5119   | PCOLN3    | -13 |
| 150696 | PROM2     | -13 |
| 3036   | HAS1      | -13 |
| 2036   | EPB41L1   | -13 |
| 2202   | EFEMP1    | -13 |
| 26232  | FBXO2     | -13 |
| 55267  | FLJ10945  | -13 |
| 148741 | ANKRD35   | -13 |
| 80736  | SLC44A4   | -13 |
| 54106  | TLR9      | -13 |
| 81607  | PVRL4     | -13 |
| 9290   | GPR55     | -13 |
| 2769   | GNA15     | -13 |
| 5045   | FURIN     | -13 |

|        |           |      |
|--------|-----------|------|
| 144347 | FAM101A   | -8.6 |
| 142683 | ITLN2     | -8.6 |
| 4130   | MAP1A     | -8.6 |
| 23187  | PHLDB1    | -8.7 |
| 137797 | LYPD2     | -8.7 |
| 2533   | FYB       | -8.7 |
| 6444   | SGCD      | -8.7 |
| 3078   | CFHR1     | -8.7 |
| 2745   | GLRX      | -8.7 |
| 6504   | SLAMF1    | -8.7 |
| 56920  | SEMA3G    | -8.7 |
| 2028   | ENPEP     | -8.7 |
| 124912 | SPACA3    | -8.7 |
| 6385   | SDC4      | -8.8 |
| 126432 | FLJ45909  | -8.8 |
| 11189  | TNRC4     | -8.8 |
| 83795  | KCNK16    | -8.8 |
| 80341  | BPIL1     | -8.8 |
| 6688   | SPI1      | -8.8 |
| 79132  | LGP2      | -8.8 |
| 2978   | GUCA1A    | -8.8 |
| 221188 | GPR114    | -8.8 |
| 3834   | KIF25     | -8.9 |
| 25959  | ANKRD25   | -8.9 |
| 348174 | LOC348174 | -8.9 |
| 8859   | STK19     | -8.9 |
| 6236   | RRAD      | -8.9 |
| 3770   | KCNJ14    | -9   |
| 84617  | TUBB6     | -9   |
| 168537 | GIMAP7    | -9   |
| 285    | ANGPT2    | -9   |
| 115352 | FCRL3     | -9   |
| 11156  | PTP4A3    | -9   |
| 7318   | UBE1L     | -9.1 |
| 8857   | FCGBP     | -9.1 |
| 93377  | TMEM10    | -9.1 |
| 6273   | S100A2    | -9.2 |
| 55340  | GIMAP5    | -9.2 |
| 2811   | GP1BA     | -9.2 |
| 30835  | CD209     | -9.2 |
| 56923  | NMUR2     | -9.2 |
| 6569   | SLC34A1   | -9.2 |
| 284756 | FLJ33860  | -9.2 |

|        |           |     |
|--------|-----------|-----|
| 4486   | MST1R     | -13 |
| 822    | CAPG      | -13 |
| 23353  | UNC84A    | -13 |
| 4245   | MGAT1     | -13 |
| 977    | CD151     | -13 |
| 1572   | CYP2F1    | -13 |
| 2886   | GRB7      | -14 |
| 388428 | FLJ44861  | -14 |
| 144501 | LOC144501 | -14 |
| 2246   | FGF1      | -14 |
| 23553  | HYAL4     | -14 |
| 9333   | TGM5      | -14 |
| 1606   | DGKA      | -14 |
| 50604  | IL20      | -14 |
| 85456  | TNKS1BP1  | -14 |
| 8581   | LY6D      | -14 |
| 9362   | CPNE6     | -14 |
| 90199  | WFDC8     | -14 |
| 195814 | RDHE2     | -14 |
| 81875  | ISG20L2   | -14 |
| 29775  | CARD10    | -14 |
| 3963   | LGALS7    | -14 |
| 7462   | LAT2      | -15 |
| 8710   | SERPINB7  | -15 |
| 83706  | URP2      | -15 |
| 9047   | SH2D2A    | -15 |
| 79755  | FLJ13841  | -15 |
| 7124   | TNF       | -15 |
| 128178 | EDARADD   | -15 |
| 63970  | P53AIP1   | -16 |
| 104    | ADARB1    | -16 |
| 201294 | UNC13D    | -16 |
| 9051   | PSTPIP1   | -16 |
| 10158  | PDZK1IP1  | -16 |
| 124222 | PAQR4     | -16 |
| 348094 | ANKDD1A   | -17 |
| 353135 | LCE1E     | -17 |
| 338785 | KRT6L     | -17 |
| 2709   | GJB5      | -17 |
| 114904 | C1QTNF6   | -17 |
| 81029  | WNT5B     | -18 |
| 118856 | MMP21     | -18 |
| 64218  | SEMA4A    | -18 |

|        |           |      |
|--------|-----------|------|
| 1675   | CFD       | -9.2 |
| 359    | AQP2      | -9.3 |
| 347853 | TBX10     | -9.3 |
| 7305   | TYROBP    | -9.3 |
| 54674  | LRRN3     | -9.3 |
| 254778 | C8orf46   | -9.3 |
| 340061 | LOC340061 | -9.4 |
| 342666 | FLJ43826  | -9.4 |
| 84467  | FBN3      | -9.4 |
| 1638   | DCT       | -9.4 |
| 9536   | PTGES     | -9.4 |
| 83638  | Bles03    | -9.5 |
| 3171   | FOXA3     | -9.5 |
| 63934  | ZNF667    | -9.5 |
| 6362   | CCL18     | -9.5 |
| 7044   | LEFTY2    | -9.5 |
| 55891  | LENEP     | -9.5 |
| 54581  | SCAND2    | -9.5 |
| 23208  | SYT11     | -9.6 |
| 9196   | KCNAB3    | -9.6 |
| 27004  | TCL6      | -9.6 |
| 57678  | GPAM      | -9.6 |
| 338323 | NALP14    | -9.7 |
| 8572   | PDLIM4    | -9.7 |
| 6614   | SN        | -9.7 |
| 146722 | CD300LF   | -9.7 |
| 10020  | GNE       | -9.7 |
| 1880   | EBI2      | -9.7 |
| 10332  | CLEC4M    | -9.7 |
| 10077  | TSPAN32   | -9.7 |
| 632    | BGLAP     | -9.7 |
| 1135   | CHRNA2    | -9.7 |
| 257236 | FLJ90575  | -9.7 |
| 203074 | UNQ9391   | -9.8 |
| 5972   | REN       | -9.8 |
| 2252   | FGF7      | -9.9 |
| 4353   | MPO       | -9.9 |
| 5969   | REGL      | -9.9 |
| 962    | CD48      | -9.9 |
| 23263  | MCF2L     | -10  |
| 57804  | POLD4     | -10  |
| 64600  | PLA2G2F   | -10  |
| 9121   | SLC16A5   | -10  |
| 1586   | CYP17A1   | -10  |

|        |           |     |
|--------|-----------|-----|
| 400931 | FLJ27365  | -18 |
| 5202   | PFDN2     | -18 |
| 144568 | A2ML1     | -18 |
| 3852   | KRT5      | -18 |
| 338442 | GPR109A   | -18 |
| 3425   | IDUA      | -18 |
| 27111  | SDCBP2    | -18 |
| 55643  | BTBD2     | -18 |
| 124220 | LOC124220 | -18 |
| 339665 | SLC35E4   | -18 |
| 2867   | FFAR2     | -18 |
| 4793   | NFKBIB    | -19 |
| 340205 | TREML1    | -19 |
| 6820   | SULT2B1   | -19 |
| 80781  | COL18A1   | -19 |
| 2810   | SFN       | -19 |
| 1775   | DNASE1L2  | -19 |
| 149708 | WFDC5     | -19 |
| 54471  | FLJ20232  | -19 |
| 7850   | IL1R2     | -19 |
| 80818  | ZNF436    | -19 |
| 23650  | TRIM29    | -20 |
| 57016  | AKR1B10   | -20 |
| 162514 | TRPV3     | -20 |
| 1128   | CHRM1     | -21 |
| 54578  | UGT1A6    | -21 |
| 54905  | CYP2W1    | -22 |
| 11259  | DOC1      | -22 |
| 2125   | EVPL      | -23 |
| 1907   | EDN2      | -23 |
| 9028   | RHBDL1    | -23 |
| 90019  | SYT8      | -23 |
| 79413  | ZBED2     | -24 |
| 55287  | TMEM40    | -24 |
| 284837 | LOC284837 | -24 |
| 84985  | FAM83A    | -25 |
| 5753   | PTK6      | -25 |
| 84951  | TNS4      | -25 |
| 65094  | JMJD4     | -25 |
| 3914   | LAMB3     | -26 |
| 23616  | SH3BP1    | -28 |
| 3866   | KRT15     | -28 |
| 9289   | GPR56     | -30 |
| 116983 | CENTB5    | -40 |

|        |                     |     |
|--------|---------------------|-----|
| 4837   | NNMT                | -10 |
| 676    | BRDT                | -10 |
| 26191  | PTPN22              | -10 |
| 23550  | PSD4                | -10 |
| 10068  | IL18BP              | -10 |
| 117156 | SCGB3A2             | -10 |
| 144124 | OR10A5              | -10 |
| 4063   | LY9                 | -10 |
| 10344  | CCL26               | -10 |
| 11269  | DDX19B              | -10 |
| 117159 | DCD                 | -10 |
| 9404   | LPXN                | -10 |
| 157769 | FAM91A1             | -10 |
| 26236  | C6orf54             | -10 |
| 5995   | RGR                 | -10 |
| 54020  | SLC37A1             | -10 |
| 4237   | MFAP2               | -10 |
| 30008  | EFEMP2              | -10 |
| 7123   | CLEC3B              | -10 |
| 4815   | NINJ2               | -10 |
| 2038   | EPB42               | -10 |
| 283807 | FBXL22              | -10 |
| 5799   | PTPRN2              | -10 |
| 114757 | CYGB                | -10 |
| 91937  | TIMD4               | -10 |
| 131375 | LYZL4               | -10 |
| 286128 | ZFP41               | -10 |
| 6445   | SGCG                | -10 |
| 25900  | HOM-<br>TES-<br>103 | -11 |
| 116835 | HSPA12B             | -11 |
| 3857   | KRT9                | -11 |
| 253935 | ANGPTL5             | -11 |
| 147429 | C18orf16            | -11 |
| 401040 | FLJ45964            | -11 |
| 148170 | CDC42EP5            | -11 |
| 1549   | CYP2A7              | -11 |
| 434    | ASIP                | -11 |
| 10801  | 9-Sep               | -11 |
| 6582   | SLC22A2             | -11 |
| 1436   | CSF1R               | -11 |
| 57088  | PLSCR4              | -11 |
| 79949  | C10orf81            | -11 |
| 220388 | FLJ38159            | -11 |



|        |           |     |
|--------|-----------|-----|
| 10395  | DLC1      | -11 |
| 83552  | MFRP      | -11 |
| 83888  | KSP37     | -11 |
| 283598 | FLJ25773  | -11 |
| 90070  | LACRT     | -11 |
| 64806  | IL17E     | -11 |
| 5304   | PIP       | -11 |
| 23543  | RBM9      | -11 |
| 2532   | DARC      | -11 |
| 3888   | KRTHB2    | -11 |
| 5159   | PDGFRB    | -11 |
| 9555   | H2AFY     | -11 |
| 4284   | MIP       | -11 |
| 4625   | MYH7      | -11 |
| 221472 | FGD2      | -11 |
| 115701 | HAK       | -11 |
| 2215   | FCGR3B    | -11 |
| 359710 | C20orf185 | -11 |
| 4878   | NPPA      | -11 |
| 140691 | RNF36     | -11 |
| 23061  | KIAA0676  | -11 |
| 80380  | PDCD1LG2  | -11 |
| 84734  | C1orf90   | -11 |
| 2012   | EMP1      | -11 |
| 374872 | C19orf35  | -11 |
| 114899 | C1QTNF3   | -11 |
| 3671   | ISLR      | -11 |
| 23436  | ELA3B     | -11 |
| 26     | ABP1      | -12 |
| 3590   | IL11RA    | -12 |
| 400931 | FLJ27365  | -12 |
| 126375 | FLJ38451  | -12 |
| 4056   | LTC4S     | -12 |
| 56833  | SLAMF8    | -12 |
| 126308 | MOBK2A    | -12 |
| 4921   | DDR2      | -12 |
| 54739  | BIRC4BP   | -12 |
| 6278   | S100A7    | -12 |
| 285676 | ZNF454    | -12 |
| 6776   | STAT5A    | -12 |
| 2865   | FFAR3     | -12 |
| 284013 | VMO1      | -12 |
| 10783  | NEK6      | -12 |
| 6358   | CCL14     | -12 |

|        |           |     |
|--------|-----------|-----|
| 5173   | PDYN      | -12 |
| 27198  | GPR81     | -12 |
| 1293   | COL6A3    | -12 |
| 6356   | CCL11     | -12 |
| 5376   | PMP22     | -12 |
| 3633   | INPP5B    | -12 |
| 83401  | ELOVL3    | -12 |
| 26526  | TSPAN16   | -12 |
| 113622 | ADPRHL1   | -13 |
| 64333  | ARHGAP9   | -13 |
| 6348   | CCL3      | -13 |
| 148423 | C1orf52   | -13 |
| 221091 | LOC221091 | -13 |
| 388533 | UNQ467    | -13 |
| 1307   | COL16A1   | -13 |
| 10669  | CGREF1    | -13 |
| 50507  | NOX4      | -13 |
| 23098  | SARM1     | -13 |
| 257203 | DSCR9     | -13 |
| 388218 | UNQ5810   | -13 |
| 81621  | KAZALD1   | -13 |
| 84766  | MGC4266   | -14 |
| 1805   | DPT       | -14 |
| 284358 | FLJ36070  | -14 |
| 4222   | MEOX1     | -14 |
| 9253   | NUMBL     | -14 |
| 56302  | TRPV5     | -15 |
| 338773 | TMEM119   | -15 |
| 7054   | TH        | -15 |
| 2214   | FCGR3A    | -15 |
| 1760   | DMPK      | -15 |
| 4939   | OAS2      | -15 |
| 29951  | PDZRN4    | -15 |
| 5368   | PNOC      | -15 |
| 401459 | FLJ46365  | -15 |
| 81493  | SYNC1     | -15 |
| 170575 | GIMAP1    | -15 |
| 10335  | MRVI1     | -16 |
| 90226  | UCN2      | -16 |
| 3956   | LGALS1    | -16 |
| 56944  | OLFML3    | -16 |
| 9358   | ITGBL1    | -16 |
| 2569   | GABRR1    | -17 |
| 57124  | CD248     | -17 |

|        |          |     |
|--------|----------|-----|
| 9002   | F2RL3    | -17 |
| 79652  | C16orf30 | -17 |
| 2694   | GIF      | -18 |
| 23500  | DAAM2    | -19 |
| 55267  | FLJ10945 | -19 |
| 343035 | C1orf36  | -19 |
| 11117  | EMILIN1  | -20 |
| 9450   | LY86     | -24 |
